# Supplementary material for: Economic evaluation of first-line cryoballoon ablation versus antiarrhythmic drug therapy for the treatment of paroxysmal atrial fibrillation from an English National Health Service perspective
Source: HighWire-hosted journal article supplement (doi:10.1136/openhrt-2023-002423), 2024-01-01
Supplement: openhrt-2023-002423supp001_data_supplement.pdf [file openhrt-2023-002423supp001_data_supplement.pdf]

Open Heart

# openheart

## An economic evaluation of first-line cryoballoon ablation versus antiarrhythmic drug therapy for the treatment of paroxysmal atrial fibrillation from an English National Health Service perspective

|                               |                                                                                                                                                                                                                                                                                                                                                                                                                                                                                                                                                                                                                                                                                                                                                                                                                                                                                                                                                                                                     |
|-------------------------------|-----------------------------------------------------------------------------------------------------------------------------------------------------------------------------------------------------------------------------------------------------------------------------------------------------------------------------------------------------------------------------------------------------------------------------------------------------------------------------------------------------------------------------------------------------------------------------------------------------------------------------------------------------------------------------------------------------------------------------------------------------------------------------------------------------------------------------------------------------------------------------------------------------------------------------------------------------------------------------------------------------|
| Journal:                      | <i>Open Heart</i>                                                                                                                                                                                                                                                                                                                                                                                                                                                                                                                                                                                                                                                                                                                                                                                                                                                                                                                                                                                   |
| Manuscript ID                 | Draft                                                                                                                                                                                                                                                                                                                                                                                                                                                                                                                                                                                                                                                                                                                                                                                                                                                                                                                                                                                               |
| Article Type:                 | Original research                                                                                                                                                                                                                                                                                                                                                                                                                                                                                                                                                                                                                                                                                                                                                                                                                                                                                                                                                                                   |
| Date Submitted by the Author: | n/a                                                                                                                                                                                                                                                                                                                                                                                                                                                                                                                                                                                                                                                                                                                                                                                                                                                                                                                                                                                                 |
| Complete List of Authors:     | Paisey, John; University Hospital Southampton NHS Foundation Trust<br>Moss, Joe; York Health Economics Consortium<br>Andrade, Jason; University of British Columbia, Division of Cardiology<br>Kuniss, Malte; Kerckhoff Heart Center<br>wazni, osama; Cleveland Clinic<br>Chierchia, Gian Battista; Universitair Ziekenhuis Brussel<br>Mealing, Stuart; York Health Economics Consortium, Associate Director of Health Technology<br>Ismyrloglou, Eleni; Medtronic Bakken Research Center BV<br>Sale, Alicia; Medtronic Inc<br>Souter, Maxim; Medtronic Limited<br>Kaplon, Rachele; Medtronic Inc<br>Bromilow, Tom; York Health Economics Consortium Ltd<br>Lane, Emily; York Health Economics Consortium Ltd<br>Lewis, Damian; York Health Economics Consortium Ltd<br>Todd, Derick; Liverpool Heart & Chest Hospital, Cardiology                                                                                                                                                                  |
| Keywords:                     | Ablation Techniques < Electrophysiology, Atrial Fibrillation < Arrhythmias, Cardiac, Health Care Economics and Organizations < Health Services                                                                                                                                                                                                                                                                                                                                                                                                                                                                                                                                                                                                                                                                                                                                                                                                                                                      |
| Abstract:                     | <p><b>Introduction</b><br/>Three recent randomised controlled trials have demonstrated that pulmonary vein isolation as an initial rhythm control strategy with cryoablation reduces atrial arrhythmia recurrence in patients with symptomatic paroxysmal atrial fibrillation (PAF) compared with antiarrhythmic drug (AAD) therapy. The aim of this study was to evaluate the cost-effectiveness of first-line cryoablation compared with first-line AADs for treating symptomatic PAF in an English National Health Service (NHS) setting.</p> <p><b>Methods</b><br/>Individual patient-level data from 703 participants with PAF enrolled into Cryo-FIRST, STOP AF First, and EARLY-AF were used to derive the parameters applied in the cost-effectiveness model (CEM). The CEM comprised a hybrid decision tree and Markov structure. The decision tree had a one-year time horizon and was used to inform the initial health state allocation in the first cycle of the Markov model (40-</p> |

<https://mc.manuscriptcentral.com/openheart>

1  
2  
3  
4  
5  
6  
7  
8  
9  
10  
11  
12  
13  
14  
15  
16  
17  
18  
19  
20  
21  
22  
23  
24  
25  
26  
27  
28  
29  
30  
31  
32  
33  
34  
35  
36  
37  
38  
39  
40  
41  
42  
43  
44  
45  
46  
47  
48  
49  
50  
51  
52  
53  
54  
55  
56  
57  
58  
59  
60

|  |                                                                                                                                                                                                                                                                                                                                                                                                                                                                                                                                                                                                                                                                                                                                                                                                                                                                                      |
|--|--------------------------------------------------------------------------------------------------------------------------------------------------------------------------------------------------------------------------------------------------------------------------------------------------------------------------------------------------------------------------------------------------------------------------------------------------------------------------------------------------------------------------------------------------------------------------------------------------------------------------------------------------------------------------------------------------------------------------------------------------------------------------------------------------------------------------------------------------------------------------------------|
|  | <p>year time horizon; three-month cycle length). Health benefits were expressed in quality-adjusted life years (QALYs). Costs and benefits were discounted at 3.5% per year. Model outcomes were generated using probabilistic sensitivity analysis.</p> <p>Results</p> <p>The results estimated that cryoablation would yield more QALYs (+0.17) and higher costs (+£641) per patient over a lifetime than AADs. This produced an incremental cost-effectiveness ratio of £3,783 per QALY gained. Independent of initial treatment, individuals were expected to receive ~1.2 ablations over a lifetime. There was a 45% relative reduction in time spent in AF health states for those initially treated with cryoablation.</p> <p>Discussion</p> <p>AF rhythm control with first-line cryoablation is cost-effective compared with first-line AADs in an English NHS setting.</p> |
|  |                                                                                                                                                                                                                                                                                                                                                                                                                                                                                                                                                                                                                                                                                                                                                                                                                                                                                      |

SCHOLARONE™  
Manuscripts

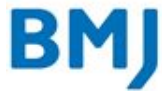

I, the Submitting Author has the right to grant and does grant on behalf of all authors of the Work (as defined in the below author licence), an exclusive licence and/or a non-exclusive licence for contributions from authors who are: i) UK Crown employees; ii) where BMJ has agreed a CC-BY licence shall apply, and/or iii) in accordance with the terms applicable for US Federal Government officers or employees acting as part of their official duties; on a worldwide, perpetual, irrevocable, royalty-free basis to BMJ Publishing Group Ltd ("BMJ") its licensees and where the relevant Journal is co-owned by BMJ to the co-owners of the Journal, to publish the Work in this journal and any other BMJ products and to exploit all rights, as set out in our [licence](#).

The Submitting Author accepts and understands that any supply made under these terms is made by BMJ to the Submitting Author unless you are acting as an employee on behalf of your employer or a postgraduate student of an affiliated institution which is paying any applicable article publishing charge ("APC") for Open Access articles. Where the Submitting Author wishes to make the Work available on an Open Access basis (and intends to pay the relevant APC), the terms of reuse of such Open Access shall be governed by a Creative Commons licence – details of these licences and which [Creative Commons](#) licence will apply to this Work are set out in our licence referred to above.

Other than as permitted in any relevant BMJ Author's Self Archiving Policies, I confirm this Work has not been accepted for publication elsewhere, is not being considered for publication elsewhere and does not duplicate material already published. I confirm all authors consent to publication of this Work and authorise the granting of this licence.

1  
2  
3  
4  
5  
6  
7  
8  
9  
10  
11  
12  
13  
14  
15  
16  
17  
18  
19  
20  
21  
22  
23  
24  
25  
26  
27  
28  
29  
30  
31  
32  
33  
34  
35  
36  
37  
38  
39  
40  
41  
42  
43  
44  
45  
46  
47  
48  
49  
50  
51  
52  
53  
54  
55  
56  
57  
58  
59  
60

1 **1. TITLE PAGE**

2 **Title:** *An economic evaluation of first-line cryoballoon ablation versus antiarrhythmic drug*  
3 *therapy for the treatment of paroxysmal atrial fibrillation from an English National Health*  
4 *Service perspective*

6 **Authors and affiliations:**

7 John Paisey<sup>1</sup>, Joe Moss<sup>2</sup>, Jason Andrade<sup>3</sup>, Malte Kuniss<sup>4</sup>, Oussama Wazni<sup>5</sup>, Gian Battista  
8 Chierchia<sup>6</sup>, Stuart Mealing<sup>2</sup>, Eleni Ismyrloglou<sup>7</sup>, Alicia Sale<sup>8</sup>, Maxim Souter<sup>9</sup>, Rachelle  
9 Kaplon<sup>8</sup>, Tom Bromilow<sup>2</sup>, Emily Lane<sup>2</sup>, Damian Lewis<sup>2</sup>, Derick Todd<sup>10</sup>

10 <sup>1</sup> *University Hospital Southampton NHS Foundation Trust, Southampton, UK*

11 <sup>2</sup> *York Health Economics Consortium, York, UK*

12 <sup>3</sup> *University of British Columbia, Vancouver, British Columbia, Canada*

13 <sup>4</sup> *Kerckhoff Heart Center, Bad Nauheim, Germany*

14 <sup>5</sup> *Cleveland Clinic, Cleveland, Ohio, USA*

15 <sup>6</sup> *Universitair Ziekenhuis Brussel and Vrije Universiteit Brussel, Brussels, Belgium*

16 <sup>7</sup> *Medtronic Bakken Research Center B.V., Maastricht, Netherlands*

17 <sup>8</sup> *Medtronic, Mounds View, MN, USA*

18 <sup>9</sup> *Medtronic Limited, Watford, UK*

19 <sup>10</sup> *Liverpool Heart and Chest Hospital, Liverpool, UK*

20

21 **Corresponding Author:** John Paisey; john.paisey@nhs.net; Tel: 07866430441;

22 Southampton General Hospital, Tremona Road, Southampton, Hampshire, SO16 6YD

1  
2  
3  
4  
5  
6  
7  
8  
9  
10  
11  
12  
13  
14  
15  
16  
17  
18  
19  
20  
21  
22  
23  
24  
25  
26  
27  
28  
29  
30  
31  
32  
33  
34  
35  
36  
37  
38  
39  
40  
41  
42  
43  
44  
45  
46  
47  
48  
49  
50  
51  
52  
53  
54  
55  
56  
57  
58  
59  
60

## 23 2. STRUCTURED ABSTRACT

### 24 *Introduction*

25 Three recent randomised controlled trials have demonstrated that pulmonary vein isolation  
26 as an initial rhythm control strategy with cryoablation reduces atrial arrhythmia recurrence in  
27 patients with symptomatic paroxysmal atrial fibrillation (PAF) compared with antiarrhythmic  
28 drug (AAD) therapy. The aim of this study was to evaluate the cost-effectiveness of first-line  
29 cryoablation compared with first-line AADs for treating symptomatic PAF in an English  
30 National Health Service (NHS) setting.

### 31 *Methods*

32 Individual patient-level data from 703 participants with PAF enrolled into Cryo-FIRST, STOP  
33 AF First, and EARLY-AF were used to derive the parameters applied in the cost-  
34 effectiveness model (CEM).

35 The CEM comprised a hybrid decision tree and Markov structure. The decision tree had a  
36 one-year time horizon and was used to inform the initial health state allocation in the first  
37 cycle of the Markov model (40-year time horizon; three-month cycle length). Health benefits  
38 were expressed in quality-adjusted life years (QALYs). Costs and benefits were discounted  
39 at 3.5% per year. Model outcomes were generated using probabilistic sensitivity analysis.

### 40 *Results*

41 The results estimated that cryoablation would yield more QALYs (+0.17) and higher costs  
42 (+£641) per patient over a lifetime than AADs. This produced an incremental cost-  
43 effectiveness ratio of £3,783 per QALY gained. Independent of initial treatment, individuals  
44 were expected to receive ~1.2 ablations over a lifetime. There was a 45% relative reduction  
45 in time spent in AF health states for those initially treated with cryoablation.

46

1  
2  
3  
4  
5  
6  
7  
8  
9  
10  
11  
12  
13  
14  
15  
16  
17  
18  
19  
20  
21  
22  
23  
24  
25  
26  
27  
28  
29  
30  
31  
32  
33  
34  
35  
36  
37  
38  
39  
40  
41  
42  
43  
44  
45  
46  
47  
48  
49  
50  
51  
52  
53  
54  
55  
56  
57  
58  
59  
60  
61  
62  
63  
64  
65  
66  
67  
68  
69  
70

47 *Discussion*

48 AF rhythm control with first-line cryoablation is cost-effective compared with first-line AADs in  
49 an English NHS setting.

50

51 **3. KEYWORDS**

52 Ablation techniques, cost-effectiveness analysis, paroxysmal atrial fibrillation, antiarrhythmic  
53 drug.

54

55 **4. INTRODUCTION**

56 Atrial fibrillation (AF) is the most common form of cardiac arrhythmia [1]. Symptoms include  
57 light-headedness, shortness of breath, tiredness, and heart palpitations; however, pathology  
58 may differ drastically between individuals [1]. AF is associated with an increased risk of  
59 mortality [2], stroke, heart failure, myocardial infarction [3] and cognitive decline [4], and  
60 psychosocial factors such as job strain and depressive symptoms [5]. Both the symptoms  
61 and potential complications of PAF contribute to a significant loss in health-related quality of  
62 life (HRQoL) [6]. The treatment and management of AF are also associated with substantial  
63 healthcare costs. In 2020, AF was predicted to directly cost the National Health Service  
64 (NHS) between £1.4 billion and £2.5 billion [7].

65

1  
2  
3 66 For people who need long-term rhythm control, antiarrhythmic drugs (AADs) are the first-line  
4  
5 67 treatment [8]. Guidance published by the National Institute for Health and Care Excellence  
6  
7 68 (NICE) recommends pulmonary vein isolation (PVI) for people who are intolerant or  
8  
9 69 refractory to AADs [8]. There are currently two leading techniques to achieve PVI:  
10  
11 70 radiofrequency ablation (RFA), which uses electrical currents to heat tissue but requires  
12  
13 71 multiple applications and targeted point-to-point delivery, and cryoablation, which is a single-  
14  
15 72 delivery approach where cryogenic energy is applied in a balloon catheter to freeze tissue.  
16  
17 73 Cryoablation has been an approved PVI technique in England since 2012 and was used in  
18  
19 74 39% of PVI procedures in the last reporting period [9, 10].  
20  
21  
22 75 Randomised controlled trial (RCT) evidence suggests cryoablation may be non-inferior to  
23  
24 76 RFA in terms of effectiveness and safety in PAF patients [11]. Additionally, three recent  
25  
26 77 RCTs have evaluated PVI with cryoablation versus AADs as an initial rhythm control strategy  
27  
28 78 in patients who are not intolerant or refractory to AADs: Cryo-FIRST (NCT01803438) [12],  
29  
30 79 STOP AF First (NCT03118518) [13] and EARLY-AF (NCT02825979) [14]. All three trials  
31  
32 80 demonstrated that, as an initial rhythm control strategy, cryoablation is superior to AAD  
33  
34 81 therapy for reducing atrial arrhythmia recurrence [12-14].  
35  
36  
37  
38 82 While cryoablation has been demonstrated to be a cost-effective therapy for PAF in a second  
39  
40 83 line setting based on data from the STOP-AF trial [15], the aim of this study was to evaluate  
41  
42 84 the cost-effectiveness of first-line cryoablation versus first-line AADs for treating symptomatic  
43  
44 85 PAF in an English NHS setting using data from all three randomised Arctic Front Advance  
45  
46 86 cryoablation trials.  
47  
48  
49  
50  
51  
52  
53  
54  
55  
56  
57  
58  
59  
60

87 **5. METHODS**88 **Statistical Analysis of Individual Patient-level Data**

89 Individual patient-level data (IPD) from 703 patients with PAF who were enrolled into Cryo-  
 90 FIRST, STOP AF First and EARLY-AF were used to derive prognostic equations to inform  
 91 input parameters for the cost-effectiveness model (CEM). Statistical analyses were  
 92 performed in R v4.1.1 or later [16].

93 The baseline characteristics for all populations included in the IPD analyses are presented in  
 94 Table 1. Patients who left the study less than 30 days after the initial ablation procedure or  
 95 less than 30 days following their final ablation procedure in either treatment arm were  
 96 excluded from the analyses as the impact of ablation could not be linked to any future costs  
 97 or benefits to inform the economic evaluation. Each clinical trial was assigned a unique Study  
 98 ID to allow for nesting effects to be controlled for in all statistical analyses. We assumed that  
 99 the pooled characteristics are broadly representative of the general first-line population in the  
 100 United Kingdom (UK). Any missing data were assumed missing completely at random.

101 **Table 1: Baseline characteristics from the clinical trials**

| Characteristic           | Cryo-FIRST     |                | STOP AF First  |                | EARLY-AF       |                | Pooled         |                |
|--------------------------|----------------|----------------|----------------|----------------|----------------|----------------|----------------|----------------|
|                          | Cryo           | AAD            | Cryo           | AAD            | Cryo           | AAD            | Cryo           | AAD            |
| Patient counts           | 97             | 105            | 103            | 97             | 154            | 147            | 354            | 349            |
| Age (Years)              | 49.9<br>(12.6) | 54.4<br>(13.5) | 60.5<br>(11.2) | 61.3<br>(11.2) | 57.8<br>(11.5) | 59.7<br>(10.5) | 56.5<br>(12.4) | 58.5<br>(12.0) |
| Sex (% Male)             | 70.10%         | 64.76%         | 61.17%         | 58.76%         | 72.72%         | 69.39%         | 68.60%         | 65.00%         |
| EQ-5D-3L-derived utility |                |                | 0.89<br>(0.19) | 0.90<br>(0.15) | 0.87<br>(0.16) | 0.87<br>(0.17) | 0.88<br>(0.17) | 0.88<br>(0.16) |
| <b>EHRA Class</b>        |                |                |                |                |                |                |                |                |
| I                        | 0%             | 0%             |                |                |                |                |                |                |
| II                       | 69.1%          | 75.2%          |                |                |                |                |                |                |
| III                      | 28.9%          | 23.8%          |                |                |                |                |                |                |
| IV                       | 2.06%          | 0.6%           |                |                |                |                |                |                |

Abbreviations: AAD, antiarrhythmic drugs; Cryo, cryoablation; EQ-5D-3L, EuroQol 5-Dimensions 3-Levels; EHRA, European Heart Rhythm Association.

\* Cells shaded grey indicate that this information was not collected in these studies.



1  
2  
3 103 The following outcomes were incorporated in the CEM:  
4  
5  
6 104 • AF recurrence and resolution.  
7  
8 105 • Rate of ablation after index treatment (re-ablation; re-ablation may represent an index  
9  
10 106 ablation for patients randomised to AAD).  
11  
12 107 • EQ-5D-3L utility values.  
13  
14 108 • Rate of AF-related hospitalisation.  
15  
16 109 • Rate of accident and emergency visits.  
17  
18 110 • Rate of pharmaceutical and electrical cardioversion.  
19  
20  
21 111 • Rate of outpatient appointments.  
22  
23  
24 112 All outcomes listed were defined as functions of the treatment arm. Selected additional  
25  
26 113 covariates of potential clinical relevance were used to produce adjusted mean estimates.  
27  
28 114 Statistical models (generalised linear models [GLMs] and generalised linear mixed models  
29  
30 115 [GLMMs]), with either a Poisson (log link), Binomial (logit link) or a Beta (logit link)  
31  
32 116 distribution, were used to model all outcomes. The most appropriate distribution for the  
33  
34 117 statistical models was chosen based on the dependent variable type (e.g., count or  
35  
36 118 continuous) and diagnostic criteria (e.g., Akaike's Information Criteria).  
37  
38  
39 119 An offset variable was included within the long-term follow-up count-based statistical models  
40  
41 120 to derive a rate per month rather than an absolute count for each patient to account for  
42  
43 121 exposure time for the relevant models. Because no NICE-approved utility value sets for the  
44  
45 122 EQ-5D-5L exist, EQ-5D-5L data were mapped to EQ-5D-3L utility values using the van Hout  
46  
47 123 algorithm [17] before the statistical analysis.  
48  
49  
50  
51  
52  
53  
54  
55  
56  
57  
58  
59  
60

1  
2  
3 124 A secondary statistical analysis was performed whereby outcomes that occurred within 12  
4  
5 125 weeks of the initial procedure were not considered. This “blinking period” is in accordance  
6  
7 126 with the Expert Consensus Statement on Catheter and Surgical Ablation of Atrial Fibrillation,  
8  
9 127 which recommends that counting AF recurrences should be avoided within the first three  
10  
11 128 months [18]. These analyses were conducted to test the sensitivity of the CEM to resource  
12  
13 129 usage in the first 12 weeks of the clinical trial to ensure no excessive resource use unduly  
14  
15 130 influenced the results. The blinking period was not applied in the base case analysis. Only  
16  
17 131 covariates deemed to significantly contribute to the predictive ability of the statistical model  
18  
19 132 are shown.

### 22 133 **Description of the Economic Model**

24  
25 134 The CEM was a hybrid of a decision tree and Markov structure. Cost and benefits were  
26  
27 135 captured in both parts of the model for a hypothetical cohort of 1,000 individuals, reflecting  
28  
29 136 the population from the three clinical trials. The model was built in Microsoft Excel and  
30  
31 137 developed from the perspective of the UK NHS and personal social services (PSS). As PAF  
32  
33 138 is expected to occur at any point in time, a three-month cycle was chosen to capture the  
34  
35 139 multiple changes in AF status throughout a year. In order to capture all costs and health  
36  
37 140 outcomes associated with the model cohort, a lifetime time horizon (40 years) was  
38  
39 141 considered. Health benefits were expressed in terms of quality-adjusted life years (QALYs),  
40  
41 142 and all benefits and costs were discounted at 3.5% per year in line with methodological  
42  
43 143 guidance from NICE [9].

44  
45  
46  
47 144  
48  
49  
50  
51  
52  
53  
54  
55  
56  
57  
58  
59  
60

1  
2  
3 145 *Decision Tree*  
4  
5  
6 146 A one-year time horizon was used in the decision tree component of the CEM to reflect the  
7  
8 147 length of the RCTs, shown in Figure 1a. The decision tree was used to estimate the patient  
9  
10 148 pathway using three health states: NSR (“Normal Sinus Rhythm”), defined as no AF  
11  
12 149 episodes (persistent or paroxysmal) recorded within three months; short-term (ST)-episodic  
13  
14 150 AF (“ST-Episodic”), defined as at least one AF episode (either paroxysmal or persistent)  
15  
16 151 documented within three months, and death. The definitions of all the health states used in  
17  
18 152 both parts of the CEM were agreed upon with the clinical experts (the listed clinical authors)  
19  
20 153 to best capture the progression of the disease in an economic model while reflecting clinical  
21  
22 154 definitions as closely as possible. The cited health states were used in place of conventional  
23  
24 155 clinical definitions to align with the three-month cycle length applied in the model, and are  
25  
26 156 based on those defined by the European Society of Cardiology [19]. The outcome of the  
27  
28 157 decision tree determined the initial state allocation in the Markov model.  
29  
30  
31  
32 158 *Markov Model*  
33  
34  
35 159 A Markov model was used for the remaining time horizon of the CEM, shown in Figure 1b.  
36  
37 160 This portion of the CEM included two additional health states: long-term persistent AF (“LT-  
38  
39 161 Persistent”), defined as the same symptoms as in the ST Episodic AF health state but over at  
40  
41 162 least a 12-month duration which does not resolve on its own, and permanent AF, defined as  
42  
43 163 AF where, accepted by the patient and physician, no further attempts to restore or maintain  
44  
45 164 NSR will be undertaken.  
46  
47  
48 165 Numerical health states were assigned corresponding to the number of ablation procedures  
49  
50 166 patients underwent during the 12-month follow-up period (excluding the initial procedure in  
51  
52 167 the cryoablation arm). Individuals could have a maximum of three ablation procedures  
53  
54 168 (including the initial procedure in the cryoablation arm). Thus, the Markov model has 14  
55  
56 169 distinct health states, including death.  
57  
58  
59  
60

1  
2  
3  
4  
5  
6  
7  
8  
9  
10  
11  
12  
13  
14  
15  
16  
17  
18  
19  
20  
21  
22  
23  
24  
25  
26  
27  
28  
29  
30  
31  
32  
33  
34  
35  
36  
37  
38  
39  
40  
41  
42  
43  
44  
45  
46  
47  
48  
49  
50  
51  
52  
53  
54  
55  
56  
57  
58  
59  
60

170 **Figure 1: Model schematic**

171 *Model Parameters*

172 The parameters included in the model are shown in Table 2. Where possible, parameter  
173 estimates were derived from the IPD analyses. The named clinical authors provided  
174 estimates for parameters where information was not collected in the RCTs or did not exist in  
175 the literature.

176 *Costs*

177 Unit costs were based on NICE clinical guidelines (NG196) and NHS reference costs  
178 2018/19. Where appropriate, costs were inflated using the PSSRU 2020/21 inflation indices  
179 (Table 2) [8]. The ablation procedure costs are available in Section 1 of the Supplementary  
180 Material. Additionally, a breakdown of the method used to derive the per cycle  
181 pharmaceutical costs is provided in Section 2 of the Supplementary Material.

182 *Utilities*

183 The impact of symptom severity and adverse events on HRQoL was captured by applying  
184 disutility to baseline utility norm values. The baseline utility norms were weighted by sex  
185 according to the distribution identified from the pooled trial data (Table 2).

1  
2  
3  
4  
5  
6  
7  
8  
9  
10  
11  
12  
13  
14  
15  
16  
17  
18  
19  
20  
21  
22  
23  
24  
25  
26  
27  
28  
29  
30  
31  
32  
33  
34  
35  
36  
37  
38  
39  
40  
41  
42  
43  
44  
45  
46  
47  
48  
49  
50  
51  
52  
53  
54  
55  
56  
57  
58  
59  
60

186 *Adverse Events*

187 The adverse event-related parameters are reported in Section 3 of the Supplementary  
188 Material. The probability of intra-operative events, including oesophageal injury, cardiac  
189 tamponade, pulmonary vein stenosis, vascular complications and persistent phrenic nerve  
190 injury, were sourced from the NICE guideline NG196. As these intra-operative events are  
191 typically short-lasting, it was assumed they would only result in additional treatment costs  
192 and there would be no impact on a patient's HRQoL. The probability of stroke was health  
193 state and age-dependent and based on the cohorts' CHA<sub>2</sub>DS<sub>2</sub>-VASc score. The probability  
194 of heart failure was health state and age-dependent and based on the general population  
195 data.

196 *Mortality*

197 The mortality-related parameters are reported in Section 4 of the Supplementary Material.  
198 Mortality was captured via a combination of UK general population life tables (adjusted to  
199 exclude stroke and heart failure-related deaths) and published stroke and heart failure-  
200 related mortality rates. The mortality rates were weighted by sex using the proportion  
201 identified in the pooled clinical trial data. These final annual rates were then converted to  
202 three-monthly rates for use in the CEM.

203 **Table 2: Key model input parameters**

| Parameter                                                             | Value   | Source                                                                                                           |
|-----------------------------------------------------------------------|---------|------------------------------------------------------------------------------------------------------------------|
| <b>Unit Costs</b>                                                     |         |                                                                                                                  |
| <i>Procedure-related costs</i>                                        |         |                                                                                                                  |
| Ablation procedure                                                    | £9,779  | Derived from ablation HRG procedure cost and average list prices provided by Medtronic [8].**                    |
| <i>Intra-operative adverse event costs (per event)</i>                |         |                                                                                                                  |
| Oesophageal injury                                                    | £26,733 | [8]                                                                                                              |
| Cardiac tamponade                                                     | £2,083  |                                                                                                                  |
| Pulmonary vein stenosis                                               | £2,777  |                                                                                                                  |
| Vascular complications                                                | £1,389  |                                                                                                                  |
| Persistent phrenic nerve injury                                       | £325    |                                                                                                                  |
| <i>Healthcare contact costs</i>                                       |         |                                                                                                                  |
| CV-related hospitalisations (excluding re-ablation procedures)        | £1,362  | [20]<br>Weighted average: Non-elective long and short stays: HRG EB07A to EB07E.                                 |
| CV-related A&E department visits (excluding re-ablation procedures)   | £332    | [20]<br>Weighted average: HRG VB01Z to VB09Z.                                                                    |
| CV-related outpatient appointments (excluding re-ablation procedures) | £191    | [20]<br>Total outpatient attendance. Service code: 320 - Cardiology.                                             |
| Pharmaceutical cardioversion                                          | £1,528  | [20]<br>Weighted average: HRG codes: EB07A-EB07E (Day case).<br>Consultant led; Cardiology; Currency code: WF01A |
| Electrical cardioversion                                              | £1,528  |                                                                                                                  |
| <i>Atrial fibrillation adverse event costs (per cycle)</i>            |         |                                                                                                                  |
| Non-disabling stroke                                                  | £2,196  | [20]<br>Weighted average of currency codes AA35E and AA35F (Stroke with CC score 0-3 and 4-6).                   |
| Moderately disabling stroke                                           | £3,622  | [20]<br>Weighted average of currency codes AA35C and AA35D (Stroke with CC score 7-9 and 10-12).                 |
| Severely disabling stroke                                             | £6,812  | [20]<br>Weighted average of currency codes AA35A and AA35B (Stroke with CC score 13-15 and 16+).                 |
| Stroke long-term cost                                                 | £293    | [21]                                                                                                             |
| Heart failure (NYHA class I)                                          | £125    | [22]                                                                                                             |
| Heart failure (NYHA class II)                                         | £159    |                                                                                                                  |
| Heart failure (NYHA class III)                                        | £183    |                                                                                                                  |
| Heart failure (NYHA class IV)                                         | £218    |                                                                                                                  |
| <i>Pharmaceutical costs (per cycle) ***</i>                           |         |                                                                                                                  |
| Cryoablation arm                                                      | £38.37  | Derived from per cycle pharmaceutical costs weighted by resource use at 12                                       |

<https://mc.manuscriptcentral.com/openheart>

| Parameter                                  | Value  | Source                                       |
|--------------------------------------------|--------|----------------------------------------------|
| AAD Arm                                    | £48.69 | months.                                      |
| <b>Utility Decrements</b>                  |        |                                              |
| <i>Health state decrements</i>             |        |                                              |
| LT-persistent                              | 0.08   | Assumption based on clinical expert opinion. |
| Permanent                                  | 0.11   | [6]                                          |
| <i>Adverse event decrements</i>            |        |                                              |
| Non-disabling stroke – short-term          | 0.00   | [23]                                         |
| Moderately disabling stroke – short-term   | 0.23   |                                              |
| Severely disabling stroke – short-term     | 0.60   |                                              |
| Non-disabling stroke – long-term           | 0.00   |                                              |
| Moderately disabling stroke – long-term    | 0.17   |                                              |
| Severely disabling stroke – long-term      | 0.35   |                                              |
| Heart failure (NYHA class I) – long-term   | 0.00   | [23]                                         |
| Heart failure (NYHA class II) – long-term  | 0.05   | [22]                                         |
| Heart failure (NYHA class III) – long-term | 0.15   |                                              |
| Heart failure (NYHA class IV) – long-term  | 0.33   |                                              |

Abbreviations: AAD, antiarrhythmic drug; LT, long-term; NYHA, New York Heart Association; ST, short-term.

\* The cited parameters include those that were not derived from analysis of the individual patient data.

\*\* The ablation procedure cost calculation is detailed in the Supplementary Material (Section 1).

\*\*\* The per cycle pharmaceutical cost calculations are detailed in the Supplementary Material (Section 2).

1  
2  
3 205 *Probabilistic Sensitivity Analysis*  
4  
5  
6 206 A probabilistic sensitivity analysis (PSA) was conducted to generate the mean cost and  
7  
8 207 QALY outcomes per patient across 5000 model iterations. The 95% credible intervals (CrI)  
9  
10 208 around these mean values, mean incremental cost-effectiveness ratio (ICER) and the  
11  
12 209 probability of cryoablation being cost-effective were also reported. To generate the input  
13  
14 210 values for each iteration, distributions were fitted to uncertain parameters within the model.  
15  
16 211 For probabilities and utilities, beta distributions were used, while cost parameters were fitted  
17  
18 212 with gamma distributions. Uncertainty around estimates provided by the regression  
19  
20 213 equations was incorporated into the model by utilising the Cholesky matrix derived from the  
21  
22 214 regression variance-covariance matrix.  
23  
24  
25 215 *Scenario Analysis*  
26  
27  
28 216 Scenario analyses, where base case input parameters were changed to those obtained from  
29  
30 217 alternative sources or varied according to clinical expert opinion or where a 12-week blanking  
31  
32 218 period was applied, were conducted to explore parameter uncertainty. The following  
33  
34 219 parameters were explored in the scenario analyses: AF recurrence risk, AF resolution rate,  
35  
36 220 ablation success rate, stroke incidence, HRQoL measures, the relative risk for stroke, the  
37  
38 221 relative risk for heart failure and procedure costs.  
39  
40  
41  
42 222  
43  
44  
45  
46  
47  
48  
49  
50  
51  
52  
53  
54  
55  
56  
57  
58  
59  
60



1  
2  
3  
4  
5  
6  
7  
8  
9  
10  
11  
12  
13  
14  
15  
16  
17  
18  
19  
20  
21  
22  
23  
24  
25  
26  
27  
28  
29  
30  
31  
32  
33  
34  
35  
36  
37  
38  
39  
40  
41  
42  
43  
44  
45  
46  
47  
48  
49  
50  
51  
52  
53  
54  
55  
56  
57  
58  
59  
60

## 223 6. RESULTS

### 224 Results of the Statistical Analysis

225 The results of the statistical analyses are reported in Section 5 of the Supplementary  
226 Material. Cryoablation is associated with a statistically significant reduction in the three-  
227 monthly rate of AF recurrence ( $p < 0.001$ ). On average, the three-monthly AF recurrence rate  
228 was 46.7% lower than those receiving AADs. However, as there was no statistically  
229 significant treatment impact on AF resolution in those who failed initial treatment, the  
230 treatment effect covariable was consequently removed from the regression model during  
231 model refinement via stepwise deletion ( $p > 0.05$ ).

232 Patients receiving cryoablation have, on average, a monthly rate of re-ablation that is 72.8%  
233 lower than those receiving AADs, a monthly rate of pharmaceutical cardioversion that is  
234 82.5% lower and a monthly rate of electrical cardioversion that is 48.9% lower than those  
235 receiving AADs. A statistically significant treatment effect was observed for the monthly rate  
236 of re-ablation ( $p < 0.001$ ) and electrical ( $p = 0.021$ ) and pharmaceutical ( $p < 0.001$ )  
237 cardioversion.

238 After stepwise selection, treatment arm ( $p = 0.025$ ) and utility at baseline ( $p < 0.001$ ) remained  
239 the only statistically significant predictors of utility at 12 months. Those with ST-episodic AF  
240 were not found to be significantly different to those in the NSR health state ( $p = 0.115$ ).

241 However, there is a non-significant trend of decreased utility associated with the ST-episodic  
242 state over the NSR state in the AAD and cryoablation group, with decrements of 0.10 and  
243 0.08, respectively.

### 244 Cost-effectiveness Results

245 The probabilistic results (Table 3) showed that cryoablation is estimated to yield 0.17  
246 incremental QALYs [CrI: 0.04 to 0.35] and a higher cost (incremental costs = £641 [CrI:  
247 -£1,210 to £2,364]) per person than AADs. This produced an ICER of £3,783 per QALY  
248 gained (CrI: £710 to £36,753).

249 **Table 3: Probabilistic cost-effectiveness results**

| Treatment                                                                   | Cryoablation                    | AADs                            | Incremental                               |
|-----------------------------------------------------------------------------|---------------------------------|---------------------------------|-------------------------------------------|
| Cost (per patient)                                                          | £21,301<br>(£19,432 to £23,264) | £20,661<br>(£18,395 to £23,174) | £641<br>(-£1210 to £2364)                 |
| QALYs (per patient)                                                         | 11.47<br>(10.88 to 11.99)       | 11.30<br>(10.65 to 11.88)       | 0.17<br>(0.04 to 0.35)                    |
| ICER                                                                        |                                 |                                 | <b>£3,783</b><br><b>(£710 to £36,753)</b> |
| NMB                                                                         |                                 |                                 | <b>£2,746</b><br><b>(-£665 to £7023)</b>  |
| Probability of cost-effectiveness at a threshold of £20,000 per QALY gained |                                 |                                 | <b>89.5%</b>                              |
| Probability of cost-effectiveness at a threshold of £30,000 per QALY gained |                                 |                                 | <b>94.3%</b>                              |

Abbreviations: AADs, antiarrhythmic drugs; CrI, credible interval; ICER, incremental cost-effectiveness ratio; NMB, net monetary benefit; QALY quality adjusted life-year.

250

251 Most PSA iterations fell in the North-east quadrant of the plane, indicating that cryoablation is  
252 more effective and more costly than AADs (Figure 2a).

253 Cryoablation is the economically preferred intervention at a willingness-to-pay (WTP)  
254 threshold of approximately £4,000 or higher (Figure 2b). The cost-acceptability analysis  
255 indicated that, at the £20,000 WTP threshold (used by NICE), 89.5% of iterations were cost-  
256 effective. Additionally, at a WTP threshold of £30,000 (the upper threshold accepted by  
257 NICE), 94.3% of iterations were cost-effective (Table 3).

### 258 **Figure 2: Cost-effectiveness plane and cost-effectiveness acceptability curve**

259 A summary of the deterministic results and additional model outcomes, including time spent  
260 in each state, life years, lifetime adverse event rates and the lifetime number of re-ablations,  
261 is reported in Section 6 of the Supplementary Material. Patients in the cryoablation arm had  
262 higher predicted life years gained and a lower lifetime rate of stroke. They also spent less  
263 time in AF health states and received fewer re-ablations.

1  
2  
3 264 In the scenario analysis (Table 4), cryoablation was found to be cost-effective versus AADs  
4  
5 265 in all scenarios explored, including when the 'blinking period' was implemented and where  
6  
7 266 additional utility decrements were applied to higher European Heart Rhythm Association  
8  
9 267 (EHRA) classes. The incremental QALYs per patient remained positive, and cryoablation  
10  
11 268 remained cost-increasing in all scenarios.

14 269 **Table 4: Scenario Analyses Results**

| Scenario                                                                                                                                                      | Incremental Costs | Incremental QALYs | ICER   |
|---------------------------------------------------------------------------------------------------------------------------------------------------------------|-------------------|-------------------|--------|
| Base case                                                                                                                                                     | £641              | 0.17              | £3,783 |
| Blanking period implemented                                                                                                                                   | £298              | 0.09              | £3,219 |
| Increased relative risk of AF recurrence relative to the number of previous ablations by 10%                                                                  | £317              | 0.18              | £1,722 |
| Increased relative risk of AF resolution relative to the number of previous ablations by 10%                                                                  | £899              | 0.16              | £5,619 |
| Decreased ablation success rate of 30% (proportionally)                                                                                                       | £572              | 0.18              | £3,252 |
| Decreased incidence of stroke by 30% (proportionally)                                                                                                         | £667              | 0.17              | £3,977 |
| EQ-5D form was replaced by AF Quality of Life Survey (AFEQT) form with additional utility decrement for higher European Heart Rhythm Association (EHRA) class | £614              | 0.08              | £7,759 |
| Changed health state specific stroke relative risk values to values sourced from published literature                                                         | £383              | 0.23              | £1,690 |
| Increased relative risk of developing heart failure for those in the permanent health state by 10%                                                            | £653              | 0.17              | £3,830 |
| Average selling price used for all procedure costs                                                                                                            | £596              | 0.17              | £3,565 |
| 2022/23 cost used for ablation procedure cost                                                                                                                 | £790              | 0.17              | £4,686 |

34 Abbreviations: EQ-5D, EuroQoL 5 Dimensions; ICER, incremental cost-effectiveness ratio; QALY quality  
35 adjusted life-year.

36 270

## 38 271 7. DISCUSSION

### 42 272 *Model and Statistical Analyses Results Discussion*

44 273 The aim of this study was to explore the clinical and economic implications of implementing  
45  
46 274 cryoablation as an alternative first-line therapy for symptomatic PAF versus first-line AADs  
47  
48 275 from an English NHS perspective.

1  
2  
3 276 The results from the economic analysis indicated that cryoablation is estimated to be more  
4  
5 277 costly than AADs over a patient's lifetime. However, cryoablation is predicted to yield higher  
6  
7 278 QALYs, resulting in an ICER of £3,783 per QALY gained. Similarly, these findings were  
8  
9 279 consistent with the scenario analyses (Table 4), with cryoablation predicted to be cost-  
10  
11 280 effective in all scenarios explored. This suggests that the results are robust to parameter  
12  
13 281 uncertainty. Thus, the ICER for cryoablation (using the pooled trials efficacy data) was below  
14  
15 282 the lower threshold used in the UK cost-effectiveness decision-making (£20,000 per QALY  
16  
17 283 gained) [24], indicating that cryoablation would be considered a highly cost-effective  
18  
19 284 alternative to AADs as an initial rhythm control therapy.  
20  
21  
22 285 Statistical modelling using the pooled clinical trial data showed that cryoablation was  
23  
24 286 associated with a statistically significant reduction in the rate of re-ablation and AF  
25  
26 287 recurrence. There were 0.89 fewer re-ablations per person and a 45% relative reduction in  
27  
28 288 the amount of time spent in AF health states over a lifetime for patients who had cryoablation  
29  
30 289 compared with those who received AADs. Additionally, it was predicted that those receiving  
31  
32 290 cryoablation in the ST-episodic health state would have a 4.26% higher 12-month utility than  
33  
34 291 those receiving AADs. Consequently, patients in the cryoablation arm incurred lower utility  
35  
36 292 decrements in the ST-episodic health state. The higher estimated QALY yield in the  
37  
38 293 cryoablation arm is, therefore, attributable to the reduction in time spent in AF health states  
39  
40 294 that are associated with higher utility decrements. This finding aligns with the Euro Heart  
41  
42 295 Survey, which showed that the decrease in HRQoL associated with AF progression is  
43  
44 296 attributed to a minor effect of the associated symptoms and a major effect of associated  
45  
46 297 adverse events due to AF [25].  
47  
48  
49  
50  
51  
52  
53  
54  
55  
56  
57  
58  
59  
60

1  
2  
3 298 *Clinical Effectiveness*  
4  
5  
6 299 While the cost-effectiveness of second-line cryoablation compared with second-line AADs  
7  
8 300 has previously been shown to fall within the range that is acceptable to NICE [15], this study  
9  
10 301 highlights that first-line cryoablation treatment is also highly cost-effective and clinically  
11  
12 302 pertinent. Since AF is a progressive disease, minimising the time from diagnosis to treatment  
13  
14 303 is crucial to improve clinical outcomes. Recently, the Early Treatment of Atrial Fibrillation for  
15  
16 304 Stroke Prevention Trial (EAST-AFNET 4) showed that early rhythm control is associated with  
17  
18 305 a significantly lower risk of adverse cardiovascular outcomes compared to usual care [26].  
19  
20 306 Further cost-effectiveness analysis of a subset of the data generated by the EAST-AFNET 4  
21  
22 307 trial projected fewer cardiovascular death and hospitalisation and stroke events over a 72-  
23  
24 308 month follow-up period for those receiving early rhythm control [27]. Moreover, as an initial  
25  
26 309 first-line rhythm control strategy, cryoablation is associated with a significant reduction in  
27  
28 310 atrial arrhythmia recurrence and re-hospitalisation compared to AAD therapy in patients with  
29  
30 311 PAF [28]. Cryoablation has also been shown to significantly lower the risk of progression  
31  
32 312 from PAF to persistent AF compared to AAD therapy, suggesting that ablation is disease-  
33  
34 313 modifying [29]. Importantly, AF progression is associated with higher risk for stroke, heart  
35  
36 314 failure and healthcare utilisation, underscoring the clinical and economic importance of  
37  
38 315 intervening early [30-32].  
39  
40  
41  
42 316 *Economic Effectiveness*  
43  
44  
45 317 In addition to the clinical advantages of early ablation, this model shows that ablation is  
46  
47 318 economically advantageous for the UK NHS Setting. A recent economic evaluation by NICE  
48  
49 319 (2021) comparing cryoablation as second-line therapy with AADs concluded that cryoablation  
50  
51 320 was cost-effective, with a reported ICER of £11,687 per QALY gained [33]. The total costs  
52  
53 321 and QALYs from this model also align with those described by Rodgers et al. (2008), who  
54  
55 322 reported stroke risk-dependent lifetime costs of £14,415 to £18,107 for AADs [34].  
56  
57  
58  
59  
60

1  
2  
3 323 The results of this model are also similar to the cost-effectiveness outcomes of RFA as a  
4  
5 324 first-line treatment compared to first-line AADs [35]; however, the cited study notes that the  
6  
7 325 cost-effectiveness of RFA in older patients ( $\geq 50$  years) is uncertain. This outcome was not  
8  
9 326 observed in the current study, which included a lifetime time horizon with a baseline age of  
10  
11 327 57.5 (i.e., based on the characteristics from the pooled RCT sample), suggesting that  
12  
13 328 cryoablation, as a first-line initial rhythm control strategy, may be a cost-effective intervention  
14  
15 329 in older patients ( $\geq 50$  years). The cited economic analyses were, however, undertaken  
16  
17 330 before the completion of the three RCTs that informed the analysis conducted in this study.  
18  
19 331 Additionally, it is important to note that the EARLY AF three-year results demonstrate that the  
20  
21 332 clinical effects of ablation persist beyond the 12 months that were analysed for the model  
22  
23 333 [29].  
24  
25  
26  
27 334 Similar outcomes have been observed for second-line RFA versus AAD therapy. Leung *et al.*  
28  
29 335 demonstrated that, despite the high initial cost associated with ablation, a significant  
30  
31 336 reduction in CV-related AEs and AF recurrence resulted in a higher QALY yield in the  
32  
33 337 ablation arm, ultimately producing a cost-effective result (ICER = £8,614) [36]. The authors  
34  
35 338 note, however, that the model only considered one repeat ablation, in contrast to the  
36  
37 339 maximum of two repeat procedures (i.e. three total procedures) captured in the current study.  
38  
39  
40  
41  
42  
43  
44  
45  
46  
47  
48  
49  
50  
51  
52  
53  
54  
55  
56  
57  
58  
59  
60

1  
2  
3 340 The current findings are also consistent with that of cost-effectiveness analyses examining  
4  
5 341 catheter ablation in other regions. Chew *et al.*, in a retrospective analysis of the CABANA  
6  
7 342 clinical trial, evaluating the cost-effectiveness of second-line ablation versus AAD therapy for  
8  
9 343 treating AF in a United States setting, found that, despite ablation being more costly than  
10  
11 344 AADs, the treatment provided a substantial enough improvement in patient HRQoL to  
12  
13 345 generate a cost-effective result [37]. Similarly, supportive economic evidence –  
14  
15 346 demonstrating ablation (RFA and cryoballoon) yields higher costs and QALYs versus AAD  
16  
17 347 therapy - has been observed from the perspective of the Chinese and South Korean  
18  
19 348 healthcare systems in populations with PAF [38, 39]. Therefore, whilst the implementation  
20  
21 349 and cost-effectiveness of an intervention in different regions can vary substantially due to  
22  
23 350 factors such as treatment pathway and source of reimbursement not being directly  
24  
25 351 comparable, the current study joins a growing body of evidence demonstrating the potential  
26  
27 352 economic benefits of adopting catheter ablation as a method of rhythm control in AF  
28  
29 353 populations.

#### 33 354 *Assumptions*

35 355 Numerous parameters, including the relative risk of AF recurrence and resolution, stroke,  
36  
37 356 heart failure and re-ablation success according to the number of ablations received and the  
38  
39 357 health state occupied, were based on assumptions. Namely, the cited parameters, which  
40  
41 358 were validated by the clinical authors to ensure clinical plausibility, were included as  
42  
43 359 conservative estimates. Similarly, the stroke rates applied in the model are based on clinical  
44  
45 360 opinion due to a failure to identify appropriate parameters in the literature. Despite a  
46  
47 361 reportedly greater risk of complication from a single instance with ablation, the greater  
48  
49 362 frequency of treatment administration with AADs compounds the risk of complication. This is  
50  
51 363 supported in contemporary literature, where the risk of complication from AAD administration  
52  
53 364 was double that of ablation at a three-year follow-up [29]. The utility decrement applied to the  
54  
55 365 ST-episodic and LT-persistent states was assumed equivalent.

1  
2  
3 366 Despite the necessity of adopting assumptions, the scenario analyses (Table 4)  
4  
5 367 demonstrated that the results are robust to parameter uncertainty. A cost-effective result was  
6  
7 368 maintained when the relative risk of AF recurrence and resolution was increased by 10% and  
8  
9 369 when the relative risk of heart failure was increased by 10% in the permanent AF state. A  
10  
11 370 cost-effective result was also maintained when the health state-specific relative risk of stroke  
12  
13 371 was changed to alternative values sourced from the literature, when the success rate of re-  
14  
15 372 ablations was reduced by 30% (proportionally) and when applying alternative EHRA class-  
16  
17 373 specific decrements.

18  
19  
20  
21 374 *Strengths*

22  
23 375 A key strength of this model is that the parameter estimates were derived from the statistical  
24  
25 376 analysis of IPD from three RCTs (Cryo-FIRST, STOP AF First and EARLY-AF) where  
26  
27 377 possible.

28  
29  
30 378 Despite the necessity of adopting some assumptions, the PSA and scenario analyses  
31  
32 379 showed that the model results were robust across all sets of results and throughout all  
33  
34 380 plausible scenarios. In addition, the model structure, parameter estimates and assumptions  
35  
36 381 were reviewed and validated by clinical experts.

37  
38  
39 382  
40  
41  
42  
43  
44  
45  
46  
47  
48  
49  
50  
51  
52  
53  
54  
55  
56  
57  
58  
59  
60



1  
2  
3 383 *Limitations*  
4  
5  
6 384 The data used to parameterise this model were subject to limitations. The AF health state  
7  
8 385 data were derived by ECG monitoring in the trials. As ECG monitors detect both symptomatic  
9  
10 386 and asymptomatic PAF events, the rate of AF recurrence and, consequently, the re-  
11  
12 387 treatment costs may be overestimated. Additionally, all three RCTs employed different ECG  
13  
14 388 monitoring methods; however, said methods were consistent between treatment arms within  
15  
16 389 each trial. These limitations may be mitigated by the trials' inclusion criteria, which specified  
17  
18 390 the enrolment of symptomatic patients. The analysis also did not estimate cryoablation to be  
19  
20 391 cost-saving (in the base case or scenario analyses). Thus, it is unlikely that the model  
21  
22 392 outcomes were affected by overestimated re-treatment costs. Prior literature has also  
23  
24 393 demonstrated no differences in major clinical outcomes for patients who present as  
25  
26 394 asymptomatic versus symptomatic, suggesting that management strategies should not be  
27  
28 395 based on symptomatic clinical status [40]. Regardless, the ECG monitoring method was  
29  
30 396 included as a confounding effect in the regression models to account for any impact this may  
31  
32 397 have on the results.

33  
34  
35  
36 398 *Conclusion*  
37

38  
39 399 This analysis illustrates that cryoablation is cost-effective compared with AADs as a first line  
40  
41 400 therapy in a PAF population. This study also generated results that were consistent with  
42  
43 401 previous economic evaluations of cryoablation versus AADs in a second line setting. The  
44  
45 402 ICER in this study was lower, suggesting that earlier intervention is an even more cost-  
46  
47 403 effective option versus delaying and treating initially with AADs. However, further studies and  
48  
49 404 economic modelling are required to confirm the cost-effectiveness of early versus delayed  
50  
51 405 ablation intervention. In summary, this study has shown that cryoablation is a highly cost-  
52  
53 406 effective option for PAF, compared with first-line AAD treatment in the UK NHS healthcare  
54  
55 407 setting.  
56  
57  
58  
59  
60

1  
2  
3  
4  
5  
6  
7  
8  
9  
10  
11  
12  
13  
14  
15  
16  
17  
18  
19  
20  
21  
22  
23  
24  
25  
26  
27  
28  
29  
30  
31  
32  
33  
34  
35  
36  
37  
38  
39  
40  
41  
42  
43  
44  
45  
46  
47  
48  
49  
50  
51  
52  
53  
54  
55  
56  
57  
58  
59  
60

408 **8. ACKNOWLEDGMENTS**

409 The authors would like to thank Shufeng Liu for her contribution to the statistical analysis and  
410 Ralf Meyer for his support during the development of this research.

411

412 **9. COMPETING INTERESTS**

413 JP reports consultancy payments and educational support received from Medtronic. JM, SM,  
414 TB, EL, DL report that Medtronic provided payment to York Health Economics (YHEC), a  
415 wholly owned subsidiary of the University of York, to conduct the statistical and cost-  
416 effectiveness analyses and write the manuscript. JA reports grants and personal fees from  
417 Medtronic, grants from Baylis, personal fees from Biosense-Webster. MK reports honoraria  
418 for teaching, participation in clinical trials, proctoring and lectures/presentations from  
419 Medtronic. OW reports grants from Medtronic and personal fees from Biosense Webster and  
420 Boston Scientific. GBC reports compensation for teaching purposes and proctoring from  
421 Medtronic, Abbott, Biotronik, Boston Scientific, and Acutus Medical. EI, AS, MS, RK report  
422 being employees and stockholders of Medtronic. DT reports speaker's fees from Boston  
423 Scientific and Abbott.

424

425 **10. FUNDING**

426 This cost-effectiveness study was funded by Medtronic.

427

428 **11. DATA AVAILABILITY STATEMENT**

429 The data underlying this article cannot be shared publicly due to privacy of the individuals  
430 that participated in the study.

1  
2  
3  
4  
5  
6  
7  
8  
9  
10  
11  
12  
13  
14  
15  
16  
17  
18  
19  
20  
21  
22  
23  
24  
25  
26  
27  
28  
29  
30  
31  
32  
33  
34  
35  
36  
37  
38  
39  
40  
41  
42  
43  
44  
45  
46  
47  
48  
49  
50  
51  
52  
53  
54  
55  
56  
57  
58  
59  
60431 **12. REFERENCES**

- 432 1. Streur MM, Ratcliffe SJ, Callans DJ, *et al.* Atrial fibrillation symptom profiles associated  
433 with healthcare utilization: A latent class regression analysis. *Pacing and clinical*  
434 *electrophysiology : PACE*. 2018.41(7):741-49. doi: <https://dx.doi.org/10.1111/pace.13356>
- 435 2. Ruddox V, Sandven I, Munkhaugen J, *et al.* Atrial fibrillation and the risk for myocardial  
436 infarction, all-cause mortality and heart failure: a systematic review and meta-analysis.  
437 *European journal of preventive cardiology*. 2017.24(14):1555-66.
- 438 3. Adderley NJ, Nirantharakumar K, Marshall T. Risk of stroke and transient ischaemic attack  
439 in patients with a diagnosis of resolved atrial fibrillation: retrospective cohort studies. *bmj*.  
440 2018.361
- 441 4. Nishtala A, Piers RJ, Himali JJ, *et al.* Atrial fibrillation and cognitive decline in the  
442 Framingham Heart Study. *Heart Rhythm*. 2018.15(2):166-72.
- 443 5. Ladwig K-H, Goette A, Atasoy S, *et al.* Psychological aspects of atrial fibrillation: A  
444 systematic narrative review: Impact on incidence, cognition, prognosis, and symptom  
445 perception. *Current cardiology reports*. 2020.22:1-11.
- 446 6. Witassek F, Springer A, Adam L, *et al.* Health-related quality of life in patients with atrial  
447 fibrillation: The role of symptoms, comorbidities, and the type of atrial fibrillation. *PloS One*.  
448 2019.14(12):e0226730. doi: <https://dx.doi.org/10.1371/journal.pone.0226730>
- 449 7. Burdett P, Lip GYH. Atrial fibrillation in the UK: predicting costs of an emerging epidemic  
450 recognizing and forecasting the cost drivers of atrial fibrillation-related costs. *European Heart*  
451 *Journal - Quality of Care and Clinical Outcomes*. 2020.8(2):187-94. doi:  
452 10.1093/ehjqcco/qcaa093
- 453 8. National Institute for Health and Care Excellence. NICE Guideline NG196 (Atrial  
454 fibrillation: diagnosis and management). 2021. Available from:  
455 <https://www.nice.org.uk/guidance/ng196/evidence/full-guideline-pdf-9081927326>.
- 456 9. The National Institute for Cardiovascular Outcomes Research. National Audit of Cardiac  
457 Rhythm Management: 2021 Summary Report. 2021. Available from:  
458 [https://www.nicor.org.uk/wp-content/uploads/2021/10/NACRM-Domain-](https://www.nicor.org.uk/wp-content/uploads/2021/10/NACRM-Domain-Report_2021_FINAL.pdf)  
459 [Report\\_2021\\_FINAL.pdf](https://www.nicor.org.uk/wp-content/uploads/2021/10/NACRM-Domain-Report_2021_FINAL.pdf).
- 460 10. National Institute for Health and Care Excellence. Interventional procedures guidance  
461 IPG427 (Percutaneous balloon cryoablation for pulmonary vein isolation in atrial fibrillation).  
462 2012. Available from: <https://www.nice.org.uk/guidance/ipg427>.
- 463 11. Kuck K-H, Furnkranz A, Chun KRJ, *et al.* Cryoballoon or radiofrequency ablation for  
464 symptomatic paroxysmal atrial fibrillation: reintervention, rehospitalization, and quality-of-life  
465 outcomes in the FIRE AND ICE trial. *European Heart Journal*. 2016.37(38):2858-65.
- 466 12. Kuniss M, Pavlovic N, Velagic V, *et al.* Cryoballoon ablation vs. antiarrhythmic drugs:  
467 first-line therapy for patients with paroxysmal atrial fibrillation. *EP Europace*.  
468 2021.23(7):1033-41. doi: 10.1093/europace/euab029
- 469 13. Wazni OM, Dandamudi G, Sood N, *et al.* Cryoballoon Ablation as Initial Therapy for Atrial  
470 Fibrillation. *New England Journal of Medicine*. 2020.384(4):316-24. doi:  
471 10.1056/NEJMoa2029554

- 1  
2  
3 472 14. Andrade JG, Wells GA, Deyell MW, *et al.* Cryoablation or Drug Therapy for Initial  
4 473 Treatment of Atrial Fibrillation. *New England Journal of Medicine*. 2021.384(4):305-15. doi:  
5 474 10.1056/NEJMoa2029980  
6  
7 475 15. Reynolds MR, Lamotte M, Todd D, *et al.* Cost-effectiveness of cryoballoon ablation for  
8 476 the management of paroxysmal atrial fibrillation. *EP Europace*. 2014.16(5):652-59. doi:  
9 477 10.1093/europace/eut380  
10  
11 478 16. R Core Team. R: A Language and Environment for Statistical Computing. R Foundation  
12 479 for Statistical Computing; 2022. Available from: <https://www.R-project.org>.  
13  
14 480 17. van Hout B, Janssen MF, Feng YS, *et al.* Interim scoring for the EQ-5D-5L: mapping the  
15 481 EQ-5D-5L to EQ-5D-3L value sets. *Value Health*. 2012.15(5):708-15. doi:  
16 482 10.1016/j.jval.2012.02.008  
17  
18 483 18. Calkins H, Hindricks G, Cappato R, *et al.* 2017 HRS/EHRA/ECAS/APHRs/SOLAECE  
19 484 expert consensus statement on catheter and surgical ablation of atrial fibrillation. *Heart*  
20 485 *Rhythm*. 2017.14(10):e275-e444. doi: 10.1016/j.hrthm.2017.05.012  
21  
22 486 19. Hindricks G, Potpara T, Dagres N, *et al.* 2020 ESC Guidelines for the diagnosis and  
23 487 management of atrial fibrillation developed in collaboration with the European Association for  
24 488 Cardio-Thoracic Surgery (EACTS) The Task Force for the diagnosis and management of  
25 489 atrial fibrillation of the European Society of Cardiology (ESC) Developed with the special  
26 490 contribution of the European Heart Rhythm Association (EHRA) of the ESC. *European heart*  
27 491 *journal*. 2021.42(5):373-498.  
28  
29 492 20. National Health Service. National Cost Collection for the NHS. 2022. Available from:  
30 493 <https://www.england.nhs.uk/costing-in-the-nhs/national-cost-collection/>.  
31  
32 494 21. Xu XM, Vestesson E, Paley L, *et al.* The economic burden of stroke care in England,  
33 495 Wales and Northern Ireland: Using a national stroke register to estimate and report patient-  
34 496 level health economic outcomes in stroke. *Eur Stroke J*. 2018.3(1):82-91. doi:  
35 497 10.1177/2396987317746516  
36  
37 498 22. Shore J, Russell J, Frankenstein L, *et al.* An analysis of the cost-effectiveness of  
38 499 transcatheter mitral valve repair for people with secondary mitral valve regurgitation in the  
39 500 UK. *Journal of Medical Economics*. 2020.23(12):1425-34. doi:  
40 501 10.1080/13696998.2020.1854769  
41  
42 502 23. Luengo-Fernandez R, Yiin GSC, Gray AM, *et al.* Population-Based Study of Acute- and  
43 503 Long-Term Care Costs after Stroke in Patients with AF. *International Journal of Stroke*.  
44 504 2012.8(5):308-14. doi: 10.1111/j.1747-4949.2012.00812.x  
45  
46 505 24. National Institute for Health and Care Excellence. Guide to the methods of technology  
47 506 appraisal (section 5.6.1) [PMG9]. 2013. Available from:  
48 507 <https://www.nice.org.uk/process/pmg9/chapter/foreword>.  
49  
50 508 25. Dudink EAMP, Erküner Ö, Berg J, *et al.* The influence of progression of atrial fibrillation  
51 509 on quality of life: a report from the Euro Heart Survey. *EP Europace*. 2017.20(6):929-34. doi:  
52 510 10.1093/europace/eux217  
53  
54 511 26. Kirchhof P, Camm AJ, Goette A, *et al.* Early Rhythm-Control Therapy in Patients with  
55 512 Atrial Fibrillation. *N Engl J Med*. 2020.383(14):1305-16. doi: 10.1056/NEJMoa2019422  
56  
57  
58  
59  
60

- 1  
2  
3 513 27. Gottschalk S, Kany S, König H-H, *et al.* Cost-effectiveness of early rhythm control vs.  
4 514 usual care in atrial fibrillation care: an analysis based on data from the EAST-AFNET 4 trial.  
5 515 Europace. 2023.euad051.  
6  
7 516 28. Andrade JG, Wazni OM, Kuniss M, *et al.* Cryoballoon ablation as initial treatment for  
8 517 atrial fibrillation: JACC state-of-the-art review. Journal of the American College of Cardiology.  
9 518 2021.78(9):914-30.  
10  
11 519 29. Andrade JG, Deyell MW, Macle L, *et al.* Progression of atrial fibrillation after cryoablation  
12 520 or drug therapy. New England Journal of Medicine. 2023.388(2):105-16.  
13  
14 521 30. Zhang W, Xiong Y, Yu L, *et al.* Meta-analysis of stroke and bleeding risk in patients with  
15 522 various atrial fibrillation patterns receiving oral anticoagulants. The American Journal of  
16 523 Cardiology. 2019.123(6):922-28.  
17  
18 524 31. Cees B. de Vos RP, Robby Nieuwlaat, Martin H. Prins, Robert G. Tieleman, Robert-Jan  
19 525 S. Coelen, Antonius C. van den Heijkant, Maurits A. Allesie, Harry J.G.M. Crijns,.  
20 526 Progression From Paroxysmal to Persistent Atrial Fibrillation: Clinical Correlates and  
21 527 Prognosis. Journal of the American College of Cardiology. 2010.55(8):725-31. doi:  
22 528 <https://doi.org/10.1016/j.jacc.2009.11.040>  
23  
24 529 32. Wong JA, Conen D, Van Gelder IC, *et al.* Progression of device-detected subclinical  
25 530 atrial fibrillation and the risk of heart failure. Journal of the American College of Cardiology.  
26 531 2018.71(23):2603-11.  
27  
28 532 33. National Institute for Health and Care Excellence. NICE guideline NG196: Cost-  
29 533 effectiveness analysis J3: Ablation. 2021. Available from:  
30 534 [https://www.nice.org.uk/guidance/ng196/evidence/j3-ablation-costeffectiveness-analysis-pdf-](https://www.nice.org.uk/guidance/ng196/evidence/j3-ablation-costeffectiveness-analysis-pdf-326949243734)  
31 535 [326949243734](https://www.nice.org.uk/guidance/ng196/evidence/j3-ablation-costeffectiveness-analysis-pdf-326949243734).  
32  
33 536 34. Rodgers M, McKenna C, Palmer S, *et al.* Curative catheter ablation in atrial fibrillation  
34 537 and typical atrial flutter: systematic review and economic evaluation. 2008.12:34. doi:  
35 538 10.3310/hta12340  
36  
37 539 35. Aronsson M, Walfridsson H, Janzon M, *et al.* The cost-effectiveness of radiofrequency  
38 540 catheter ablation as first-line treatment for paroxysmal atrial fibrillation: results from a  
39 541 MANTRA-PAF substudy. EP Europace. 2015.17(1):48-55.  
40  
41 542 36. Leung LW, Imhoff RJ, Marshall HJ, *et al.* Cost-effectiveness of catheter ablation versus  
42 543 medical therapy for the treatment of atrial fibrillation in the United Kingdom. Journal of  
43 544 Cardiovascular Electrophysiology. 2022.33(2):164-75.  
44  
45 545 37. Chew DS, Li Y, Cowper PA, *et al.* Cost-effectiveness of catheter ablation versus  
46 546 antiarrhythmic drug therapy in atrial fibrillation: the CABANA randomized clinical trial.  
47 547 Circulation. 2022.146(7):535-47.  
48  
49 548 38. Hu M, Han Y, Zhao W, *et al.* Long-term cost-effectiveness comparison of catheter  
50 549 ablation and antiarrhythmic drugs in atrial fibrillation treatment using discrete event  
51 550 simulation. Value in Health. 2022.25(6):975-83.  
52  
53 551 39. Kim W, Kim M, Kim YT, *et al.* Cost-effectiveness of rhythm control strategy: Ablation  
54 552 versus antiarrhythmic drugs for treating atrial fibrillation in Korea based on real-world data.  
55 553 Frontiers in Cardiovascular Medicine. 2023.10:52.  
56  
57  
58  
59  
60

1  
2  
3 554 40. Sgreccia D, Manicardi M, Malavasi VL, *et al.* Comparing outcomes in asymptomatic and  
4 555 symptomatic atrial fibrillation: a systematic review and meta-analysis of 81,462 patients.  
5 556 *Journal of clinical medicine.* 2021.10(17):3979.  
6  
7 557

8  
9 558 **13. FIGURE LEGENDS**

10  
11 559 **Figure 1:** Schematic of the economic model. (Panel a) Decision tree; (Panel b) Markov  
12 560 model. The decision tree endpoints constitute the initial state allocation in the Markov model.  
13  
14 561 Abbreviations: AAD, antiarrhythmic drugs; AF, atrial fibrillation; LT, long term; NSR, normal  
15  
16 562 sinus rhythm; ST, short term.

17  
18  
19  
20 563 **Figure 2:** Graphical outputs from the probabilistic sensitivity analysis. (Panel a) Cost-  
21 564 effectiveness plane; (Panel b) Cost-effectiveness acceptability curve. The data points  
22 565 presented in the cost-effectiveness plane represent the incremental costs and QALYs  
23 566 produced by 5,000 model iterations generated by the PSA. Most model iterations fell in the  
24 567 North-east quadrant, indicating cryoablation is more effective and more costly. Additionally,  
25 568 most iterations fell below the £20,000 (89.5% of iterations were cost-effective) and £30,000  
26 569 (94.3% of iterations were cost-effective) threshold lines. The CEAC indicates that  
27 570 cryoablation is the economically preferred intervention at a WTP threshold of approximately  
28 571 £4,000 or higher. Abbreviations: AAD, antiarrhythmic drugs; CEAC, cost-effectiveness  
29 572 acceptability curve; PSA, probabilistic sensitivity analysis; QALY, quality-adjusted life-year.  
30  
31  
32  
33  
34  
35  
36  
37  
38  
39  
40  
41  
42  
43  
44  
45  
46  
47  
48  
49  
50  
51  
52  
53  
54  
55  
56  
57  
58  
59  
60



1  
2  
3  
4  
5  
6  
7  
8  
9  
10  
11  
12  
13  
14  
15  
16  
17  
18  
19  
20  
21  
22  
23  
24  
25  
26  
27  
28  
29  
30  
31  
32  
33  
34  
35  
36  
37  
38  
39  
40  
41  
42  
43  
44  
45  
46  
47  
48  
49  
50  
51  
52  
53  
54  
55  
56  
57  
58  
59  
60

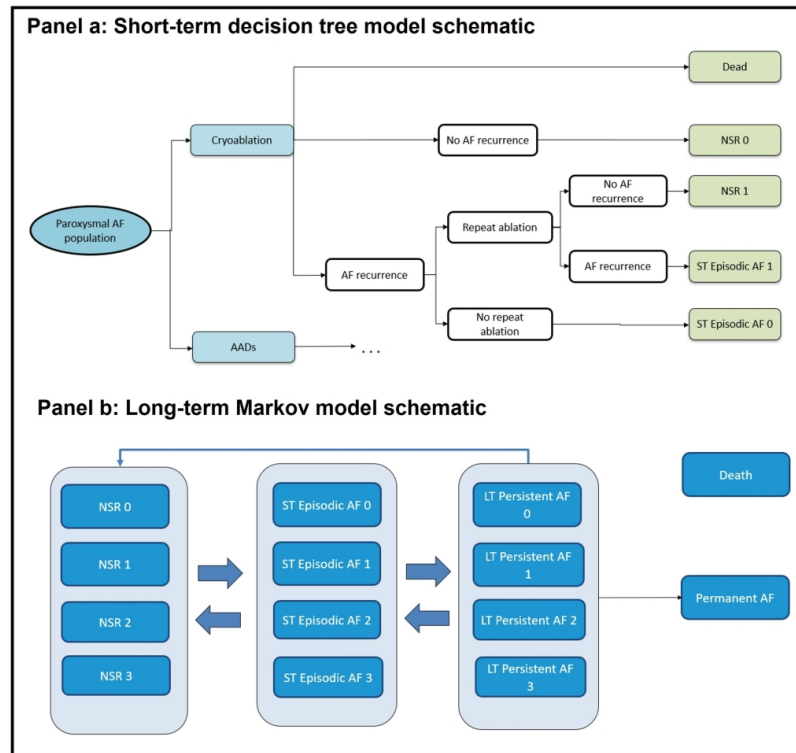

Figure 1: Schematic of the economic model. (Panel a) Decision tree; (Panel b) Markov model. The decision tree endpoints constitute the initial state allocation in the Markov model. Abbreviations: AAD, antiarrhythmic drugs; AF, atrial fibrillation; LT, long term; NSR, normal sinus rhythm; ST, short term.

209x187mm (300 x 300 DPI)

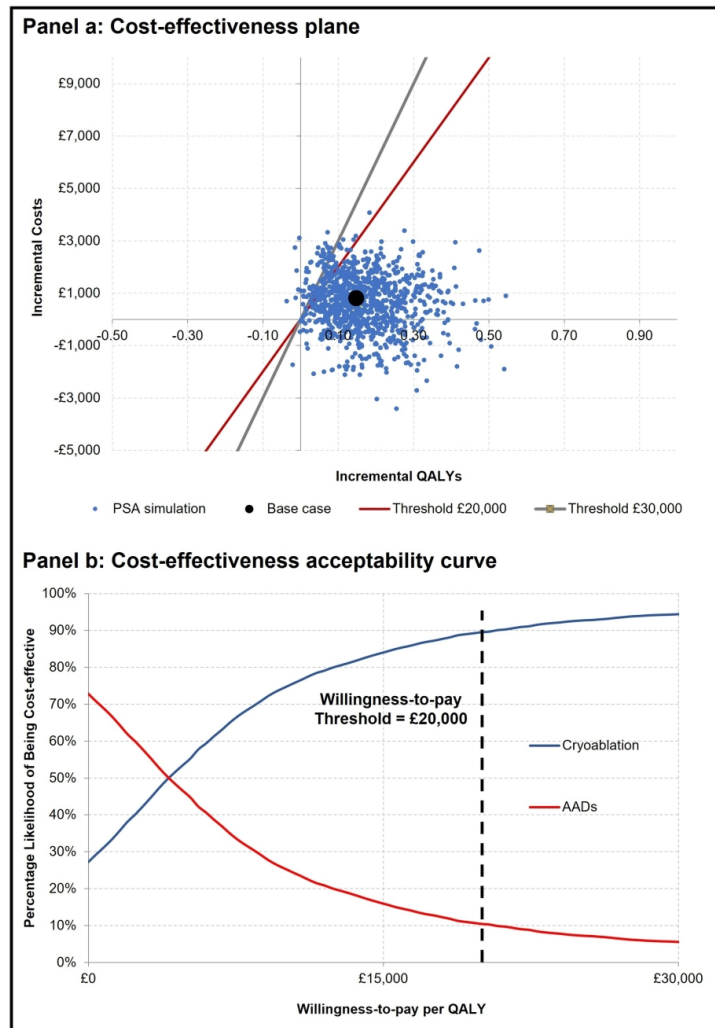

45 Figure 2: Graphical outputs from the probabilistic sensitivity analysis. (Panel a) Cost-effectiveness plane;  
46 (Panel b) Cost-effectiveness acceptability curve. The data points presented in the cost-effectiveness plane  
47 represent the incremental costs and QALYs produced by 5,000 model iterations generated by the PSA. Most  
48 model iterations fell in the North-east quadrant, indicating cryoablation is more effective and more costly.  
49 Additionally, most iterations fell below the £20,000 (89.5% of iterations were cost-effective) and £30,000  
50 (94.3% of iterations were cost-effective) threshold lines. The CEAC indicates that cryoablation is the  
51 economically preferred intervention at a WTP threshold of approximately £4,000 or higher. Abbreviations:  
52 AAD, antiarrhythmic drugs; CEAC, cost-effectiveness acceptability curve; PSA, probabilistic sensitivity  
53 analysis; QALY, quality-adjusted life-year.

54 180x249mm (300 x 300 DPI)

55 <https://mc.manuscriptcentral.com/openheart>



1  
2  
3 **1 SUPPLEMENTARY MATERIAL**  
4

5  
6  
7 **2 1. ABLATION PROCEDURE COSTS**  
8

9  
10 The total ablation cost applied in the model was calculated based on HRG codes published  
11  
12 in the 2018/19 NHS reference costs and equipment-related costs listed in the NG196 clinical  
13  
14 guideline published by NICE [1]. Consistent with the NICE Guideline NG196, reference costs  
15  
16 from 2018/19 were applied to account for any confounding influence of the COVID-19  
17  
18 pandemic on the 2020/21 costs. The procedure- and equipment-related costs are displayed  
19  
20 in Table S1.  
21

22  
23 **9 Table S1: Procedure and equipment-related cost parameters**  
24

| Procedure/equipment                      | Cost           | Source                                                                          |
|------------------------------------------|----------------|---------------------------------------------------------------------------------|
| Ablation HRG                             | £4,118         | [2]<br>Weighted average: Non-elective long and short stays: HRG EY30A to EY30B. |
| Cryoballoon                              | £3,552         | NICE NG196 [1]                                                                  |
| Flexcath sheath                          | £768           |                                                                                 |
| Achieve catheter                         | £768           |                                                                                 |
| Introducer (Swartz braided trans-septal) | £130           |                                                                                 |
| Needle                                   | £106           |                                                                                 |
| CS access catheter (diagnostic catheter) | £307           |                                                                                 |
| Cable (decapolar catheter)               | £30            |                                                                                 |
| <b>Total Procedure Cost</b>              | <b>£11,514</b> |                                                                                 |

25  
26  
27  
28  
29  
30  
31  
32  
33  
34  
35  
36  
37 Abbreviations: CS, coronary sinus; HRG, health resource group.  
38

39  
40  
41  
42  
43  
44  
45  
46  
47  
48  
49  
50  
51  
52  
53  
54  
55  
56  
57  
58  
59  
60

1  
2  
3  
4  
5  
6  
7  
8  
9  
10  
11  
12  
13  
14  
15  
16  
17  
18  
19  
20  
21  
22  
23  
24  
25  
26  
27  
28  
29  
30  
31  
32  
33  
34  
35  
36  
37  
38  
39  
40  
41  
42  
43  
44  
45  
46  
47  
48  
49  
50  
51  
52  
53  
54  
55  
56  
57  
58  
59  
60

## 11 2. PHARMACEUTICAL COSTS

12 The per cycle (three-monthly) pharmaceutical costs applied in the model (Table 1 in the main  
13 text [Cryoablation = £38.37; AADs = £48.69]) reflect an average of the per cycle costs of  
14 each pharmacologic agent (anti-coagulation and AADs), weighted by the resource use of  
15 said agents in each arm.

16 The per cycle cost of each agent was derived from the cost per mg (i.e. the unit cost divided  
17 by the pack size and indicated dose) multiplied by the total mg administered in 12 months  
18 (calculated from the indicated dose) to produce an annual cost. Subsequently, the annual  
19 cost was divided by four to generate a per cycle cost. Unit costs were sourced from the  
20 British National Formulary (BNF), employing the lowest cost available at the time of model  
21 development [3]. Similarly, the indicated doses used to calculate the annual total mg  
22 administered were sourced from the BNF and validated by the clinical co-authors [3]. The per  
23 cycle costs of each agent are presented in Table S2.

24 The resource use parameters were generated from the statistical analysis of the available  
25 clinical trial data. As these data were only available up to the 12-month follow-up visit, it was  
26 assumed that the observed resource use for each pharmaceutical agent was maintained for  
27 the entire time horizon. The resource use parameters were stratified according to whether  
28 data from the initial 12-month period were included (i.e. whether the blanking period was  
29 implemented). The derived resource use is presented in Table S3.

30 **Table S2: Per cycle pharmaceutical costs**

| Drug                          | Unit Cost | Indication                                                          | Pack Size | Dose (mg) | Cost Per Cycle* |
|-------------------------------|-----------|---------------------------------------------------------------------|-----------|-----------|-----------------|
| <b>Anti-coagulation Drugs</b> |           |                                                                     |           |           |                 |
| Warfarin                      | £0.61     | 7.5 mg daily                                                        | 28        | 5         | £2.97           |
| Aspirin                       | £0.75     | 75 mg daily                                                         | 28        | 75        | £2.44           |
| Rivaroxaban                   | £180.00   | 20 mg daily                                                         | 100       | 20        | £164            |
| Dabigatran                    | £51.00    | 110 mg twice daily                                                  | 60        | 110       | £155            |
| Apixaban                      | £53.20    | 5 mg twice daily                                                    | 56        | 5         | £173            |
| Edoxaban                      | £49.00    | 45 mg daily                                                         | 28        | 60        | £122            |
| Phenprocoumon                 | £0.00     | NA                                                                  | 0         | 0         | £0.00           |
| Ticagrelor                    | £54.60    | 90 mg twice daily                                                   | 56        | 90        | £177            |
| <b>Anti-arrhythmic Drugs</b>  |           |                                                                     |           |           |                 |
| Amiodarone                    | £1.67     | 200mg 3x day for 1 week, 200mg 2x day for 1 week, then 200mg 1x day | 28        | 200       | £5.74           |
| Dronedarone                   | £67.49    | 400mg twice daily                                                   | 60        | 400       | £205            |
| Flecainide                    | £2.52     | 100mg daily                                                         | 60        | 50        | £7.64           |
| Propafenone                   | £7.37     | 150mg 3 times a day                                                 | 90        | 150       | £22.36          |
| Sotalol                       | £0.96     | 240mg daily                                                         | 28        | 40        | £18.72          |

Abbreviations: mg, Milligram.

\* The cost per cycle was derived from an annual cost, which was calculated by multiplying the annual total mg administered by the cost per mg (not presented).

31

32 **Table S3: Pharmaceutical resource use derived from the statistical analysis**

| Drug                          | Cryoablation                |                         | AADs                        |                         |
|-------------------------------|-----------------------------|-------------------------|-----------------------------|-------------------------|
|                               | Blanking Period Not Applied | Blanking Period Applied | Blanking Period Not Applied | Blanking Period Applied |
| <b>Anti-coagulation Drugs</b> |                             |                         |                             |                         |
| Warfarin                      | 3.95%                       | 0.00%                   | 2.58%                       | 0.00%                   |
| Aspirin                       | 6.50%                       | 2.56%                   | 4.30%                       | 2.03%                   |
| Rivaroxaban                   | 6.78%                       | 1.42%                   | 7.16%                       | 0.00%                   |
| Dabigatran                    | 0.56%                       | 0.57%                   | 2.29%                       | 2.32%                   |
| Apixaban                      | 14.69%                      | 14.77%                  | 13.75%                      | 20.87%                  |
| Edoxaban                      | 0.00%                       | 0.00%                   | 0.00%                       | 0.00%                   |
| Phenprocoumon                 | 0.00%                       | 0.00%                   | 0.29%                       | 0.29%                   |
| Ticagrelor                    | 0.00%                       | 0.00%                   | 0.29%                       | 0.29%                   |
| <b>Anti-arrhythmic Drugs</b>  |                             |                         |                             |                         |
| Amiodarone                    | 0.00%                       | 0.00%                   | 0.29%                       | 0.29%                   |
| Dronedarone                   | 0.28%                       | 0.28%                   | 3.15%                       | 2.61%                   |
| Flecainide                    | 1.13%                       | 1.14%                   | 22.35%                      | 22.61%                  |
| Propafenone                   | 0.00%                       | 0.00%                   | 0.29%                       | 9.28%                   |
| Sotalol                       | 0.28%                       | 0.28%                   | 3.72%                       | 3.77%                   |

Abbreviations: AADs, anti-arrhythmic drugs.

33

34 **3. ADVERSE EVENT PARAMETERS**35 **Table S4: Probability of intra-operative adverse events**

| Event                           | Probability | Source |
|---------------------------------|-------------|--------|
| Oesophageal injury              | 0.13%       | [1]    |
| Cardiac tamponade               | 0.25%       |        |
| Pulmonary vein stenosis         | 0.25%       |        |
| Vascular complications          | 0.50%       |        |
| Persistent phrenic nerve injury | 1.72%       |        |

37 **Table S5: Stroke risk by CHA<sub>2</sub>DS<sub>2</sub>-VASc score**

| Score | Risk  | Source |
|-------|-------|--------|
| 0     | 0.2%  | [4]    |
| 1     | 0.6%  |        |
| 2     | 2.2%  |        |
| 3     | 3.2%  |        |
| 4     | 4.8%  |        |
| 5     | 7.2%  |        |
| 6     | 9.7%  |        |
| 7     | 11.2% |        |
| 8     | 10.8% |        |
| 9     | 12.2% |        |

39 **Table S6: CHA<sub>2</sub>DS<sub>2</sub>-VASc score by age**

| Age category | Score | Source                                                                                                                                                                                                       |
|--------------|-------|--------------------------------------------------------------------------------------------------------------------------------------------------------------------------------------------------------------|
| 15 to 39     | 1.3   | Baseline study data.<br>Those aged 60 - 79 have their CHA <sub>2</sub> DS <sub>2</sub> -VASc score increased by 1.<br>Those aged 80+ have their CHA <sub>2</sub> DS <sub>2</sub> -VASc score increased by 2. |
| 40 to 49     | 1.3   |                                                                                                                                                                                                              |
| 50 to 59     | 1.3   |                                                                                                                                                                                                              |
| 60 to 69     | 2.3   |                                                                                                                                                                                                              |
| 70 to 79     | 2.3   |                                                                                                                                                                                                              |
| 80 to 89     | 3.3   |                                                                                                                                                                                                              |
| 90 and over  | 3.3   |                                                                                                                                                                                                              |

41 **Table S7: Stroke incidence by age and CHA<sub>2</sub>DS<sub>2</sub>-VASc score**

| Age category | Deterministic |
|--------------|---------------|
| 15 to 39     | 1.1%          |
| 40 to 49     | 1.1%          |
| 50 to 59     | 1.1%          |
| 60 to 69     | 2.5%          |
| 70 to 79     | 2.5%          |
| 80 to 89     | 3.7%          |
| 90 and over  | 3.7%          |

44 **Table S8: Health state-specific relative risk values**

| Values used in the base case            |                         |             |
|-----------------------------------------|-------------------------|-------------|
| Health state                            | Relative Risk of Stroke | Source      |
| NSR versus general population           | 0.34                    | Assumption. |
| ST-Episodic versus general population   | 0.40                    |             |
| LT-Persistent versus general population | 0.60                    |             |
| Permanent versus general population     | 1.50                    |             |
| Values used in the scenario analysis    |                         |             |
| Health state                            | Relative Risk of Stroke | Source      |
| NSR versus general population           | 1.00                    | Assumption. |
| ST-Episodic versus general population   | 2.12                    | [5]         |
| LT-Persistent versus ST-Episodic        | 1.44                    | [6]         |
| Permanent versus ST-Episodic            | 1.83                    |             |

Abbreviations: LT, long-term; NSR, normal sinus rhythm; ST, short-term.

45

46 **Table S9: Heart failure incidence by age in the general population**

| Age category | Deterministic | Source |
|--------------|---------------|--------|
| 15 to 34     | 0.004%        | [7]    |
| 35 to 44     | 0.013%        |        |
| 45 to 54     | 0.050%        |        |
| 55 to 64     | 0.200%        |        |
| 65 to 74     | 0.630%        |        |
| 75+          | 1.640%        |        |

47

48 **Table S10: Heart failure severity distribution**

| NYHA class | Share  | Source |
|------------|--------|--------|
| I          | 22.14% | [8]    |
| II         | 40.52% |        |
| III        | 28.99% |        |
| IV         | 8.34%  |        |

49

1  
2  
3 **50 4. MORTALITY PARAMETERS**  
4  
5

6 51 The following formula was used to calculate mortality rates in the CEM:

7  
8 52 *All-cause mortality = [(prob. general mortality \* (1- probability of stroke – probability of HF)) +*  
9  
10 53 *(prob stroke related mortality \* probability of stroke) + (prob HF related mortality\* probability*  
11  
12 54 *of HF)].*  
13

14 55 **Table S11: General mortality rates**

| Age     | Male   | Female | Overall | Source |
|---------|--------|--------|---------|--------|
| 15 - 19 | 0.02%  | 0.01%  | 0.02%   | [9]    |
| 20 - 24 | 0.04%  | 0.02%  | 0.03%   |        |
| 25 - 29 | 0.06%  | 0.02%  | 0.05%   |        |
| 30 - 34 | 0.08%  | 0.05%  | 0.07%   |        |
| 35 - 39 | 0.12%  | 0.07%  | 0.11%   |        |
| 40 - 44 | 0.18%  | 0.11%  | 0.16%   |        |
| 45 - 49 | 0.29%  | 0.18%  | 0.25%   |        |
| 50 - 54 | 0.43%  | 0.26%  | 0.37%   |        |
| 55 - 59 | 0.64%  | 0.40%  | 0.56%   |        |
| 60 - 64 | 0.99%  | 0.64%  | 0.88%   |        |
| 65 - 69 | 1.57%  | 0.97%  | 1.37%   |        |
| 70 - 74 | 2.43%  | 1.58%  | 2.14%   |        |
| 75 - 79 | 4.21%  | 2.83%  | 3.75%   |        |
| 80 - 84 | 7.46%  | 5.24%  | 6.72%   |        |
| 85 - 89 | 13.24% | 9.91%  | 12.13%  |        |
| 90 +    | 24.63% | 21.66% | 23.65%  |        |

32 56

33  
34  
35 57 **Table S12: Stroke mortality rates**

| Age category | Mortality rate | Source |
|--------------|----------------|--------|
| 18 to 24     | 3.90%          | [10]   |
| 25 to 34     | 3.90%          |        |
| 35 to 44     | 3.90%          |        |
| 45 to 54     | 3.90%          |        |
| 55 to 64     | 6.20%          |        |
| 65 to 74     | 10.65%         |        |
| 75+          | 19.00%         |        |

44 58

45  
46  
47 59 **Table S13: Heart failure mortality rates**

| Age category | Mortality rate | Source |
|--------------|----------------|--------|
| 16 to 24     | 16.44%         | [11]   |
| 25 to 34     | 16.44%         |        |
| 35 to 44     | 16.44%         |        |
| 45 to 54     | 16.44%         |        |
| 55 to 64     | 20.39%         |        |
| 65 to 74     | 29.65%         |        |
| 75+          | 47.05%         |        |

56  
57 60

1  
2  
3  
4  
5  
6  
7  
8  
9  
10  
11  
12  
13  
14  
15  
16  
17  
18  
19  
20  
21  
22  
23  
24  
25  
26  
27  
28  
29  
30  
31  
32  
33  
34  
35  
36  
37  
38  
39  
40  
41  
42  
43  
44  
45  
46  
47  
48  
49  
50  
51  
52  
53  
54  
55  
56  
57  
58  
59  
60

## 61 5. STATISTICAL ANALYSES OUTPUTS

62 Chi-squared stepwise selection with a cut-off p-value of 0.05, was performed on all outcomes  
63 to generate refined statistical models containing only the covariates that were deemed to  
64 significantly contribute to the predictive ability of the statistical model. The most appropriate  
65 distribution for the statistical models was chosen based on the dependent variable type (e.g.,  
66 count or continuous) and diagnostic criteria (e.g., Akaike's Information Criteria).

### 67 *Rate of AF recurrence and resolution*

68 The rate of AF recurrence and resolution were derived using GLM with a Poisson (log link)  
69 distribution. To derive a three-monthly rate of recurrence and resolution, an offset variable for  
70 the natural log of exposure time was used.

71 **Table S14: Three-monthly rate of AF recurrence (whole study period)**

|                                 | Coefficient | Standard Error | z-value | p-value |
|---------------------------------|-------------|----------------|---------|---------|
| Intercept                       | -2.771      | 0.175          | -15.802 | <0.001* |
| Treatment (Cryo)                | -0.629      | 0.130          | -4.843  | <0.001* |
| Ambulatory device (Yes)         | 0.484       | 0.216          | 2.245   | 0.024*  |
| Implantable loop recorder (Yes) | 1.162       | 0.186          | 6.234   | <0.001* |

p\* = output reached statistical significance at 95% confidence interval.

72

73 **Table S15: Three-monthly rate of AF resolution (whole study period)**

|                                 | Coefficient | Standard Error | z-value | p-value |
|---------------------------------|-------------|----------------|---------|---------|
| Intercept                       | -0.441      | 0.094          | -4.665  | <0.001* |
| Implantable loop recorder (Yes) | 0.403       | 0.124          | 3.259   | 0.001*  |

p\* = output reached statistical significance at 95% confidence interval.

74

### 75 *Rate of repeat ablation (re-ablation)*

76 The rate of repeat ablation was derived from a GLM with a Poisson distribution and log-link.  
77 A monthly rate of repeat ablations was derived from an offset variable for the natural log of  
78 exposure time.



79 **Table S16: Rate of re-ablation (whole study period)**

|                  | Coefficient | Standard Error | z-value | p-value |
|------------------|-------------|----------------|---------|---------|
| Intercept        | -3.843      | 0.108          | -35.639 | <0.001* |
| Treatment (Cryo) | -1.302      | 0.231          | -5.640  | <0.001* |

p\* = output reached statistical significance at 95% confidence interval.

80

81 *Rate of pharmaceutical and electrical cardioversion*

82 The rates of pharmaceutical and electrical cardioversion were derived from a GLMM with a  
83 Poisson distribution and log-link function. An offset variable for time was used, producing  
84 monthly rates. A random effect was included to control for variation between patients.

85 **Table S17: Rate of electrical cardioversion (whole study period)**

|                  | Coefficient | Standard Error | z-value | p-value |
|------------------|-------------|----------------|---------|---------|
| Intercept        | -4.815      | 0.171          | -28.074 | <0.001* |
| Treatment (Cryo) | -0.672      | 0.291          | -2.304  | 0.021*  |

p\* = output reached statistical significance at 95% confidence interval.

86

87 **Table S18: Rate of pharmaceutical cardioversion (whole study period)**

|                  | Coefficient | Standard Error | z-value | p-value |
|------------------|-------------|----------------|---------|---------|
| Intercept        | -4.234      | 0.864          | -4.898  | <0.001* |
| Treatment (Cryo) | -1.744      | 0.489          | -3.566  | <0.001* |
| Age              | -0.036      | 0.013          | -2.852  | 0.004*  |
| 7-day Holter     | 1.574       | 0.538          | 2.923   | 0.003*  |

p\* = output reached statistical significance at 95% confidence interval.

88

89 *Cardiovascular-related hospitalisation and accident and emergency visits*

90 The rates of cardiovascular (CV)-related hospitalisations and A&E visits were derived from a  
91 GLMM with a Poisson distribution and log-link function. An offset variable for time was used,  
92 producing monthly rates. A random effect was included to control for variation between  
93 patients.

94 **Table S19: Rate of CV-related hospitalisation (whole study period)**

|           | Coefficient | Standard Error | z-value | p-value |
|-----------|-------------|----------------|---------|---------|
| Intercept | -9.235      | 0.694          | -13.307 | <0.001* |

p\* = output reached statistical significance at 95% confidence interval.

60

95 **Table S20: Rate of CV-related accident and emergency visits (whole study period)**

|           | Coefficient | Standard Error | z-value | p-value |
|-----------|-------------|----------------|---------|---------|
| Intercept | -2.978      | 0.283          | -10.519 | <0.001* |

p\* = output reached statistical significance at 95% confidence interval.

96

97 *EQ-5D-3L utility values*

98 Utility values were derived from a generalised linear mixed model (GLMM) with a Beta

99 distribution and a logit link function. A random effect was included to control for variation

100 between patients.

101 **Table S21: Twelve-month EQ-5D-3L utility**

|                   | Coefficient | Standard Error | z-value | p-value |
|-------------------|-------------|----------------|---------|---------|
| Intercept         | -0.282      | 0.260          | -1.084  | 0.278   |
| AF status (ST-AF) | -0.747      | 0.474          | -1.576  | 0.115   |
| Treatment (Cryo)  | 0.219       | 0.098          | 2.234   | 0.025*  |
| Baseline utility  | 2.689       | 0.289          | 9.319   | <0.001* |

p\* = output reached statistical significance at 95% confidence interval.

102

103 *Rate of Outpatient Visits*

104 The rate of outpatient visits was derived from a GLM with a Poisson distribution and a log-

105 link function. A random effect was included to control for variation between patients. An offset

106 variable for time was used, producing a monthly rate.

107 **Table S22: Rate of CV-related outpatient appointments (whole study period)**

|           | Coefficient | Standard Error | z-value | p-value |
|-----------|-------------|----------------|---------|---------|
| Intercept | -9.143      | 0.650          | -14.065 | <0.001* |

p\* = output reached statistical significance at 95% confidence interval.

108

109 *Probabilities applied in the CEM*

110 **Table S23: Per-cycle rates derived from the IPD analysis**

|                                       | AAD  | Cryoablation |
|---------------------------------------|------|--------------|
| Three-monthly rate of AF recurrence   | 0.12 | 0.06         |
| Three-monthly rate of AF resolution   | 0.76 | 0.76         |
| Monthly rate of re-ablation procedure | 0.02 | 0.01         |

111 Abbreviations: AAD, antiarrhythmic drugs; AF, atrial fibrillation; IPD, individual patient data.

112

113 **6. ADDITIONAL MODEL OUTCOMES**114 **Table S24: Deterministic cost-effectiveness results (per patient)**

| Outcome                                            | Cryoablation   | AADs           | Incremental   |
|----------------------------------------------------|----------------|----------------|---------------|
| Initial procedure                                  | £9,779         | £0             | £9,779        |
| Re-ablations                                       | £1,889         | £8,037         | -£6,148       |
| Healthcare contact costs                           | £4,391         | £6,507         | -£2,116       |
| Pharmaceutical costs                               | £2,414         | £3,062         | -£648         |
| AF-related adverse events                          | £2,558         | £2,638         | -£80          |
| Intra-operative adverse events                     | £65            | £46            | £19           |
| <b>Total cost per patient</b>                      | <b>£21,096</b> | <b>£20,291</b> | <b>£805</b>   |
| <b>QALYs per patient</b>                           | <b>11.71</b>   | <b>11.56</b>   | <b>0.15</b>   |
| <b>Incremental cost-effectiveness ratio (ICER)</b> |                |                | <b>£5,472</b> |

115 Abbreviations: AADs, antiarrhythmic drugs; AF, atrial fibrillation; ICER, incremental cost-effectiveness ratio; NNT,  
 116 number needed to treat; QALY, quality-adjusted life years.

118 **Table S25: Additional model results (per patient)**

| Outcome                                 | Cryoablation | AADs  | Incremental | NNT    |
|-----------------------------------------|--------------|-------|-------------|--------|
| <b>Time Spent in Each State (Years)</b> |              |       |             |        |
| Normal sinus rhythm                     | 21.64        | 19.61 | 2.03        |        |
| Short-term episodic                     | 2.21         | 3.72  | -1.51       |        |
| Long-term persistent                    | 0.32         | 0.61  | -0.28       |        |
| Permanent                               | 0.26         | 0.48  | -0.22       |        |
| <b>Life Years</b>                       |              |       |             |        |
| Undiscounted life years                 | 24.42        | 24.41 | 0.01        |        |
| Discounted life years                   | 15.73        | 15.72 | 0.01        |        |
| <b>Lifetime Adverse Event Rates</b>     |              |       |             |        |
| Stroke                                  | 0.26         | 0.27  | 0.01        | 75     |
| Heart failure                           | 0.10         | 0.10  | 0.00        | -7,656 |
| <b>Number of Re-ablations</b>           |              |       |             |        |
| Twelve months                           | 0.07         | 0.25  | -0.18       |        |
| Time horizon (40 years)                 | 0.27         | 1.16  | -0.89       |        |

119 Abbreviations: AADs, antiarrhythmic drugs; ICER, incremental cost-effectiveness ratio; NNT, number needed to treat; QALY, quality-adjusted life years.

1  
2  
3  
4  
5  
6  
7  
8  
9  
10  
11  
12  
13  
14  
15  
16  
17  
18  
19  
20  
21  
22  
23  
24  
25  
26  
27  
28  
29  
30  
31  
32  
33  
34  
35  
36  
37  
38  
39  
40  
41  
42  
43  
44  
45  
46  
47  
48  
49  
50  
51  
52  
53  
54  
55  
56  
57  
58  
59  
60

120 **7. REFERENCES**

- 121 1. National Institute for Health and Care Excellence. NICE Guideline NG196 (Atrial  
122 fibrillation: diagnosis and management). 2021. Available from:  
123 [https://www.nice.org.uk/guidance/ng196/evidence/j3-ablation-costeffectiveness-](https://www.nice.org.uk/guidance/ng196/evidence/j3-ablation-costeffectiveness-analysis-pdf-326949243734)  
124 [analysis-pdf-326949243734](https://www.nice.org.uk/guidance/ng196/evidence/j3-ablation-costeffectiveness-analysis-pdf-326949243734).
- 125 2. National Health Service. 2018/19 National Cost Collection Data Publication. 2019.  
126 Available from: [https://www.england.nhs.uk/publication/2018-19-national-cost-](https://www.england.nhs.uk/publication/2018-19-national-cost-collection-data-publication/)  
127 [collection-data-publication/](https://www.england.nhs.uk/publication/2018-19-national-cost-collection-data-publication/).
- 128 3. British National Formulary. British National Formulary. 2022. Available from:  
129 <https://bnf.nice.org.uk/>.
- 130 4. Friberg L, Rosenqvist M, Lip GY. Evaluation of risk stratification schemes for ischaemic  
131 stroke and bleeding in 182 678 patients with atrial fibrillation: the Swedish Atrial  
132 Fibrillation cohort study. *Eur Heart J*. 2012;33(12):1500-10.
- 133 5. Friberg L, Hammar N, Rosenqvist M. Stroke in paroxysmal atrial fibrillation: report from the  
134 Stockholm Cohort of Atrial Fibrillation. *European Heart Journal*. 2010;31(8):967-75.
- 135 6. Vanassche T, Lauw MN, Eikelboom JW, Healey JS, Hart RG, Alings M, *et al*. Risk of  
136 ischaemic stroke according to pattern of atrial fibrillation: analysis of 6563 aspirin-  
137 treated patients in ACTIVE-A and AVERROES. *Eur Heart J*. 2015;36(5):281-7a.
- 138 7. Christiansen MN, Køber L, Weeke P, Vasan RS, Jeppesen JL, Smith JG, *et al*. Age-  
139 Specific Trends in Incidence, Mortality, and Comorbidities of Heart Failure in Denmark,  
140 1995 to 2012. *Circulation*. 2017;135(13):1214-23.
- 141 8. Zhang R, Ma S, Shanahan L, Munroe J, Horn S, Speedie S. Discovering and identifying  
142 New York heart association classification from electronic health records. *BMC Medical*  
143 *Informatics and Decision Making*. 2018;18(2):48.

- 1  
2  
3 144 9. Nomis (Office of National Statistics). Official Census and Labour Market Statistics. 2020.  
4  
5 145 Available from: <https://www.nomisweb.co.uk/>.  
6  
7  
8 146 10. Saposnik G, Cote R, Phillips S, Gubitz G, Bayer N, Minuk J, *et al*. Stroke outcome in  
9  
10 147 those over 80: a multicenter cohort study across Canada. *Stroke*. 2008;39(8):2310-7.  
11  
12 148 11. Vaartjes I, Hoes AW, Reitsma JB, de Bruin A, Grobbee DE, Mosterd A, *et al*. Age- and  
13  
14 149 gender-specific risk of death after first hospitalization for heart failure. *BMC Public*  
15  
16 150 *Health*. 2010;10:637.  
17  
18  
19 151  
20  
21  
22  
23  
24  
25  
26  
27  
28  
29  
30  
31  
32  
33  
34  
35  
36  
37  
38  
39  
40  
41  
42  
43  
44  
45  
46  
47  
48  
49  
50  
51  
52  
53  
54  
55  
56  
57  
58  
59  
60
